# Supplementary material for: Efficacy of Niclosamide vs Placebo in SARS-CoV-2 Respiratory Viral Clearance, Viral Shedding, and Duration of Symptoms Among Patients With Mild to Moderate COVID-19: A Phase 2 Randomized Clinical Trial
Source: PubMed Central journal article supplement (PMC8829666; doi:10.1001/jamanetworkopen.2021.44942), 2022-02-09
Supplement: jamanetwopen-e2144942-s002.pdf [file jamanetwopen-e2144942-s002.pdf]

1  
2  
3  
4  
5  
6  
7  
8  
9  
10  
11  
12  
13  
14  
15  
16  
17  
18  
19  
20  
21  
22  
23  
24  
25  
26  
27  
28  
29  
30  
31  
32  
33  
34

**Niclosamide for Patients with Mild to Moderate Disease**  
**from Novel Coronavirus (COVID-19)**  
**Principal Investigator: Harry Selker, MD**  
**01202021**

35 **Summary of Changes from Previous Version:**

36

| <b>Affected Section(s)</b>                   | <b>Summary of Revisions Made</b>                                                                                                                                                                                                      | <b>Rationale</b>                                                                                              |
|----------------------------------------------|---------------------------------------------------------------------------------------------------------------------------------------------------------------------------------------------------------------------------------------|---------------------------------------------------------------------------------------------------------------|
| Protocol Title                               | Addition of asymptomatic patients                                                                                                                                                                                                     | 1. FDA recommendation                                                                                         |
| Study Synopsis                               | Addition of Day 21 fecal specimen, addition of asymptomatic participants, addition of Wellforce and Clinical Research Network (CRN) sites for recruitment. Study duration 2 months, study completion 4 months                         | 1. FDA recommendation<br>2. Recruitment optimization<br>3. Decreased numbers of daily COVID positive patients |
| Section 3.0 Objectives and endpoints         | The primary objective of this study is to determine if a course of treatment with niclosamide improves respiratory viral clearance compared to treatment with placebo.                                                                | 1. Viral shedding endpoint                                                                                    |
| Section 4.0 Study design                     | Reduction in fecal viral shedding as measured by fecal PCR on days, 3, 7, 10, 14. Day 21 fecal specimen added.                                                                                                                        | 1. FDA recommendation                                                                                         |
| Section 4.3 Justification of Dose            | Additional literature and background added                                                                                                                                                                                            | 1. FDA recommendation                                                                                         |
| Section 5.1 Inclusion Criteria               | Physical assessment data removed. No need for oxygen supplementation added.                                                                                                                                                           | 1. Virtual recruitment                                                                                        |
| 5.2 Exclusion Criteria                       | Systemic treatments removed as exclusion.                                                                                                                                                                                             | 1. FDA recommendation                                                                                         |
| 5.3 Lifestyle considerations                 | Advisement to avoid alcohol added                                                                                                                                                                                                     | 1. FDA recommendation                                                                                         |
| 5.5 Strategies for recruitment and retention | 1. Updates to include Wellforce and CRN sites<br>2. Twenty-dollar (\$20) ClinCard payment at each specimen collection timepoint<br>3. Update to recruitment with community outreach, study information distribution and nurses script | 1. Recruitment enhancement<br>2. Time and effort of participants for specimen collection                      |

|                                                        |                                                                                                                                                                                                                                                                                                                                                                                                                                                                                                                                                                                                                                                                                                                                   |                       |
|--------------------------------------------------------|-----------------------------------------------------------------------------------------------------------------------------------------------------------------------------------------------------------------------------------------------------------------------------------------------------------------------------------------------------------------------------------------------------------------------------------------------------------------------------------------------------------------------------------------------------------------------------------------------------------------------------------------------------------------------------------------------------------------------------------|-----------------------|
|                                                        |                                                                                                                                                                                                                                                                                                                                                                                                                                                                                                                                                                                                                                                                                                                                   |                       |
| 6.1.1. Study Intervention                              | Day 21 fecal specimen added<br>Additional data on oropharyngeal specimen collection added                                                                                                                                                                                                                                                                                                                                                                                                                                                                                                                                                                                                                                         | 1. FDA recommendation |
| 6.2.2 Formulation, Appearance, Packaging and Labeling  | Study drug specific information added as provided by Bayer Pharmaceuticals                                                                                                                                                                                                                                                                                                                                                                                                                                                                                                                                                                                                                                                        | 1. Updated as per IND |
| 6.2.3 and 6.2.4 Product storage and preparation        | Changed to blister packaging                                                                                                                                                                                                                                                                                                                                                                                                                                                                                                                                                                                                                                                                                                      | 1. Updated as per IND |
| 7.2 Participant discontinuation/ withdrawal from study | Revised                                                                                                                                                                                                                                                                                                                                                                                                                                                                                                                                                                                                                                                                                                                           | 1. FDA recommendation |
| 8.1 Efficacy assessments                               | <p>Baseline and screening (Day 0)<br/>Record COVID symptoms, if symptomatic</p> <p>Record number of days since onset of symptoms, if symptomatic</p> <p>Follow-up Evaluation</p> <ul style="list-style-type: none"> <li>• Collect temperature and oximetry data daily, with the caveat that if O2 goes below 92%, an addition oximeter reading should be taken 2 hours later. <u>ADDED</u>: If the follow-up O2 saturation remains below 92%, the participant will be referred to their Primary Care Physician (PCP) or to the local Emergency Department</li> <li>•Collect fecal samples for viral shedding Day 21 added</li> </ul> <p><b><u>Early Termination/Hospitalization</u></b></p> <p>A 30-day follow-up call and AE</p> | 1. FDA recommendation |

|                                |                                                                                                      |                                                                                    |
|--------------------------------|------------------------------------------------------------------------------------------------------|------------------------------------------------------------------------------------|
|                                | assessment for those patients who are hospitalized will be performed.                                |                                                                                    |
| 8.3.7 Reporting of pregnancy   | Additional information added re: pregnancy and breast feeding                                        | 1. FDA recommendation                                                              |
| 10.1.6 Safety Oversight        | Independent Safety Monitor and stopping rules added                                                  | 1. FDA recommendation                                                              |
| 4.1 Overall Study Design       | Addition of affiliate site recruitment detail                                                        | 1. Reliance affiliate                                                              |
| 1.1 Study Synopsis             | Primary endpoint change                                                                              | 1. Primary Efficacy Endpoint: Respiratory viral clearance at Day 3.                |
| 1.2 Schedule of activities     | Addition of +/- 1 1-day windows                                                                      | 1. Increase options for participant study visits                                   |
| 4.1 Overall study design       | Increase sample size to n=200                                                                        | 1. The current positivity rate on Day 1 of ~40% results in ITT sample size of 200. |
| 5.1 Exclusion Criteria         | Add: History of receipt of COVID-19 vaccine                                                          | 1. Potential effect of vaccine on viral shedding                                   |
| 5.2 Strategies for Recruitment | Added: Newton Wellesley Hospital, Maine Medical Center and New England Quality Care Alliance (NEQCA) | 1. Agreed to distribute study brochures and posters                                |

|                               |                                                                                                                                                                                                                                                                                                        |                                                                                                                                                 |
|-------------------------------|--------------------------------------------------------------------------------------------------------------------------------------------------------------------------------------------------------------------------------------------------------------------------------------------------------|-------------------------------------------------------------------------------------------------------------------------------------------------|
| 6.1 Study Intervention        | <p>Removed: Transport by courier service to the Tufts Medical Center</p> <p>Telemedicine Platform</p> <p>Removed: Amwell</p> <p>Added: A HIPPA compliant telehealth platform; e.g., Doximity, will be used to conduct remote study visits.</p> <p>Added: COVID positive list generated twice daily</p> | <ol style="list-style-type: none"> <li>1. No contact FedEx pickup/ delivery to CLIA certified lab</li> <li>2. Doximity platform used</li> </ol> |
| 9.1 Statistical Hypothesis    | Sample size calculation revision                                                                                                                                                                                                                                                                       | <ol style="list-style-type: none"> <li>1. Sample size increase</li> </ol>                                                                       |
| 9.2 Sample Size Determination | Revised                                                                                                                                                                                                                                                                                                | <ol style="list-style-type: none"> <li>1. Increase d sample size</li> </ol>                                                                     |
| 9.3 Populations for analysis  | Modified Intention-to-Treat Analysis Dataset modified                                                                                                                                                                                                                                                  | <ol style="list-style-type: none"> <li>1. Sample size increase</li> </ol>                                                                       |
| 9.4 Statistical Analysis      | Revised analysis of the primary endpoint                                                                                                                                                                                                                                                               | <ol style="list-style-type: none"> <li>1. Sample size increase</li> </ol>                                                                       |

## Table of Contents

|    |                                                                     |    |
|----|---------------------------------------------------------------------|----|
| 38 | STATEMENT OF COMPLIANCE .....                                       | 1  |
| 39 | 1 <b>PROTOCOL SUMMARY</b> .....                                     | 1  |
| 40 | 1.1     Synopsis.....                                               | 1  |
| 41 | Schema 3                                                            |    |
| 42 | 1.2     Schedule of Activities (SoA).....                           | 3  |
| 43 | 2 <b>INTRODUCTION</b> .....                                         | 5  |
| 44 | 2.1     Study Rationale.....                                        | 5  |
| 45 | 2.2     Background.....                                             | 6  |
| 46 | 2.3     Risk/Benefit Assessment.....                                | 7  |
| 47 | 2.3.1     Known Potential Risks.....                                | 7  |
| 48 | 2.3.2     Known Potential Benefits.....                             | 7  |
| 49 | 2.3.3     Assessment of Potential Risks and Benefits.....           | 7  |
| 50 | 3 <b>OBJECTIVES AND ENDPOINTS</b> .....                             | 8  |
| 51 | 4 <b>STUDY DESIGN</b> .....                                         | 8  |
| 52 | 4.1     Overall Design.....                                         | 8  |
| 53 | 4.2     Scientific Rationale for Study Design.....                  | 10 |
| 54 | 4.3     Justification for Dose .....                                | 10 |
| 55 | 4.4     End of Study Definition .....                               | 11 |
| 56 | 5 <b>STUDY POPULATION</b> .....                                     | 11 |
| 57 | 5.1     Inclusion Criteria .....                                    | 12 |
| 58 | 5.2     Exclusion Criteria.....                                     | 12 |
| 59 | 5.3     Lifestyle Considerations.....                               | 12 |
| 60 | 5.4     Screen Failures.....                                        | 12 |
| 61 | 5.5     Strategies for Recruitment and Retention.....               | 12 |
| 62 | 6 <b>STUDY INTERVENTION</b> .....                                   | 13 |
| 63 | 6.1     Study Intervention(s) Administration.....                   | 13 |
| 64 | 6.1.1     Study Intervention Description .....                      | 13 |
| 65 | 6.1.2     Dosing and Administration.....                            | 15 |
| 66 | 6.2     Preparation/Handling/Storage/Accountability .....           | 15 |
| 67 | 6.2.1     Acquisition and accountability .....                      | 15 |
| 68 | 6.2.2     Formulation, Appearance, Packaging, and Labeling.....     | 16 |
| 69 | 6.2.3     Product Storage and Stability.....                        | 16 |
| 70 | 6.2.4     Preparation.....                                          | 16 |
| 71 | 6.3     Measures to Minimize Bias: Randomization and Blinding.....  | 16 |
| 72 | 6.4     Study Intervention Compliance.....                          | 16 |
| 73 | 6.5     Concomitant Therapy.....                                    | 17 |
| 74 | 6.5.1     Rescue Medicine.....                                      | 17 |
| 75 | 7 <b>STUDY INTERVENTION DISCONTINUATION AND PARTICIPANT</b>         |    |
| 76 | <b>DISCONTINUATION/WITHDRAWAL</b> .....                             | 17 |
| 77 | 7.1     Discontinuation of Study Intervention .....                 | 17 |
| 78 | 7.2     Participant Discontinuation/Withdrawal from the Study ..... | 18 |
| 79 | 7.3     Lost to Follow-Up.....                                      | 18 |
| 80 | 8 <b>STUDY ASSESSMENTS AND PROCEDURES</b> .....                     | 19 |
| 81 | 8.1     Efficacy Assessments .....                                  | 19 |
| 82 | 8.2     Safety and Other Assessments .....                          | 21 |
| 83 | 8.3     Adverse Events and Serious Adverse Events.....              | 21 |

|     |         |                                                                   |    |
|-----|---------|-------------------------------------------------------------------|----|
| 84  | 8.3.1   | Classification of an Adverse Event.....                           | 22 |
| 85  | 8.3.2   | Time Period and Frequency for Event Assessment and Follow-Up..... | 23 |
| 86  | 8.3.3   | Adverse Event Reporting.....                                      | 23 |
| 87  | 8.3.4   | Serious Adverse Event Reporting .....                             | 23 |
| 88  | 8.3.5   | Reporting Events to Participants .....                            | 24 |
| 89  | 8.3.6   | Events of Special Interest.....                                   | 24 |
| 90  | 8.3.7   | Reporting of Pregnancy .....                                      | 24 |
| 91  | 8.4     | Unanticipated Problems.....                                       | 24 |
| 92  | 8.4.1   | Definition of Unanticipated Problems (UP):.....                   | 24 |
| 93  | 8.4.2   | Unanticipated Problem Reporting.....                              | 24 |
| 94  | 8.4.3   | Reporting Unanticipated Problems to Participants .....            | 25 |
| 95  | 9       | STATISTICAL CONSIDERATIONS .....                                  | 25 |
| 96  | 9.1     | Statistical Hypotheses.....                                       | 25 |
| 97  | 9.2     | Sample Size Determination.....                                    | 25 |
| 98  | 9.3     | Populations for Analyses .....                                    | 25 |
| 99  | 9.4     | Statistical Analyses.....                                         | 26 |
| 100 | 9.4.1   | General Approach.....                                             | 26 |
| 101 | 9.4.2   | Analysis of the Secondary Endpoint(s).....                        | 27 |
| 102 | 9.4.3   | Safety Analyses.....                                              | 27 |
| 103 | 9.4.4   | Baseline Descriptive Statistics .....                             | 27 |
| 104 | 9.4.5   | Planned Interim Analyses .....                                    | 28 |
| 105 | 9.4.6   | Sub-Group Analyses .....                                          | 28 |
| 106 | 9.4.7   | Tabulation of Individual participant Data .....                   | 28 |
| 107 | 9.4.8   | Exploratory Analyses.....                                         | 28 |
| 108 | 10      | SUPPORTING DOCUMENTATION AND OPERATIONAL CONSIDERATIONS .....     | 28 |
| 109 | 10.1    | Regulatory, Ethical, and Study Oversight Considerations.....      | 28 |
| 110 | 10.1.1  | Informed Consent Process .....                                    | 28 |
| 111 | 10.1.2  | Study Discontinuation and Closure .....                           | 30 |
| 112 | 10.1.3  | Confidentiality and Privacy .....                                 | 30 |
| 113 | 10.1.4  | Future Use of Data.....                                           | 31 |
| 114 | 10.1.5  | Key Roles and Study Governance .....                              | 31 |
| 115 | 10.1.6  | Safety Oversight.....                                             | 32 |
| 116 | 10.1.7  | Clinical Monitoring.....                                          | 33 |
| 117 | 10.1.8  | Quality Assurance and Quality Control.....                        | 34 |
| 118 | 10.1.9  | Data Handling and Record Keeping.....                             | 34 |
| 119 | 10.1.10 | Protocol Deviations.....                                          | 35 |
| 120 | 10.1.11 | Publication and Data Sharing Policy.....                          | 35 |
| 121 | 10.1.12 | Conflict of Interest Policy .....                                 | 35 |
| 122 | 10.2    | Additional Considerations.....                                    | 36 |
| 123 | 10.3    | Abbreviations.....                                                | 37 |
| 124 | 10.4    | Protocol Amendment History .....                                  | 39 |
| 125 | 11      | REFERENCES .....                                                  | 40 |
| 126 |         |                                                                   |    |

## 127 STATEMENT OF COMPLIANCE

128 The trial will be carried out in accordance with International Conference on Harmonisation Good Clinical  
129 Practice (ICH GCP) and the following:

- 130 • United States (US) Code of Federal Regulations (CFR) applicable to clinical studies (45 CFR  
131 Part 46, 21 CFR Part 50, 21 CFR Part 56, 21 CFR Part 312, and/or 21 CFR Part 812)

132  
133 National Institutes of Health (NIH)-funded investigators and clinical trial site staff who are responsible  
134 for the conduct, management, or oversight of NIH-funded clinical trials have completed Human Subjects  
135 Protection and ICH GCP Training.

136  
137 The protocol, informed consent form(s), recruitment materials, and all participant materials will be  
138 submitted to the Institutional Review Board (IRB) for review and approval. Approval of both the  
139 protocol and the consent form must be obtained before any participant is enrolled. Any amendment to  
140 the protocol will require review and approval by the IRB before the changes are implemented to the  
141 study. In addition, all changes to the consent form will be IRB-approved; a determination will be made  
142 regarding whether a new consent needs to be obtained from participants who provided consent, using a  
143 previously approved consent form.

## 144 1 PROTOCOL SUMMARY

### 145 1.1 SYNOPSIS

**Title:** Niclosamide for Patients with Mild to Moderate Disease from Novel Coronavirus (COVID-19)

**Study Description:** This study will evaluate the antihelmintic drug, niclosamide, as a potential treatment for mild to moderate coronavirus disease 2019 (COVID-19). Niclosamide, which has potent antiviral activity against single-stranded RNA viruses including coronaviruses, was proposed as an antiviral during the SARS outbreak in 2002 and has activity including SARS-CoV-2 where it was found to inhibit SARS coronavirus, SARS-CoV, in *in vitro* studies and similarly structured RNA viruses (both *in vitro* and *in vivo*). We hypothesize that the antiviral activity of Niclosamide may be extended to COVID-19.

**Objectives:**

- Primary Objective: To evaluate the efficacy of niclosamide in shortening contagious period as determined by time to viral clearance.
- Secondary Objectives: To evaluate the efficacy of niclosamide in mitigating clinical outcomes and shortening duration of symptoms resulting from COVID-



19 infection.

- Endpoints:**
- Primary Efficacy Endpoint: Respiratory viral clearance at Day 3.
  - Secondary Efficacy Endpoints:
    - Fecal viral clearance at Day 14.
    - Reduction in viral shedding as measured by oropharyngeal swab on days 1, 3, 7, 10, 14
    - Reduction in fecal viral shedding as measured by fecal PCR on days 1, 3, 7, 10, 14, 21
    - Progression to severe COVID, as a composite endpoint defined as O2 saturation <92% on room air in two consecutive measurements at least 2 hours apart OR requirement of hospitalization OR need for artificial ventilation OR death.
    - Time to resolution of fever

Safety endpoint: incidence of Adverse Events (AEs)

**Study Population:** Patients 18 years of age or older who are COVID-19 (SARS-CoV-2) positive by PCR who are asymptomatic or have mild to moderate symptoms of COVID infection.

**Phase:** Phase II

**Description of Sites/Facilities** Study participants will be recruited for participation from Tufts Medical Center, Wellforce and Clinical Research Network (CRN) sites.

**Enrolling Participants:** Participants will be identified as those reporting to Tufts Medical Center, Wellforce and CRN sites for outpatient COVID-19 testing. Patients with SARS-CoV-2 positive test results will be provided the option to participate in our study. The Study Team will enroll and randomize patients into the study after the patient has a confirmed positive test result and meets all the inclusion and none of the exclusion criteria.

Additional sites and/or social media may be used to enhance recruitment. The study will be listed at [www.clinicaltrials.gov](http://www.clinicaltrials.gov).

**Description of Study Intervention:** Participants in the treatment arm will receive niclosamide 2 grams orally once daily for 7 days in addition to current standard of care treatment. Those in the control group will receive placebo by mouth in the same numbers of pills on day 1 and daily for 6 more days (total 7 days of treatment) in addition to current standard of care treatment. Fecal samples and oropharyngeal swab samples will be collected for viral shedding as measured by PCR on days 3, 7, 10, 14 and 21 (fecal sample only). A baseline fecal and oropharyngeal sample will be obtained on Day 1 prior to starting dosing of niclosamide/ placebo.

**Study Duration:** The study is estimated to complete enrollment within 2-months of initiation of enrollment; however, enrollment will remain open until the study goal is met. The duration of the entire project is anticipated to be a maximum of 4 months.

**Participant Duration:** Individual participant will complete all participant visits within 30 days. Adverse events will be monitored and collected by the Study Team from the point of signed consent until 7 (for non-serious adverse events) or 30 days (for serious adverse events) after the last day of study participation.

146 SCHEMA

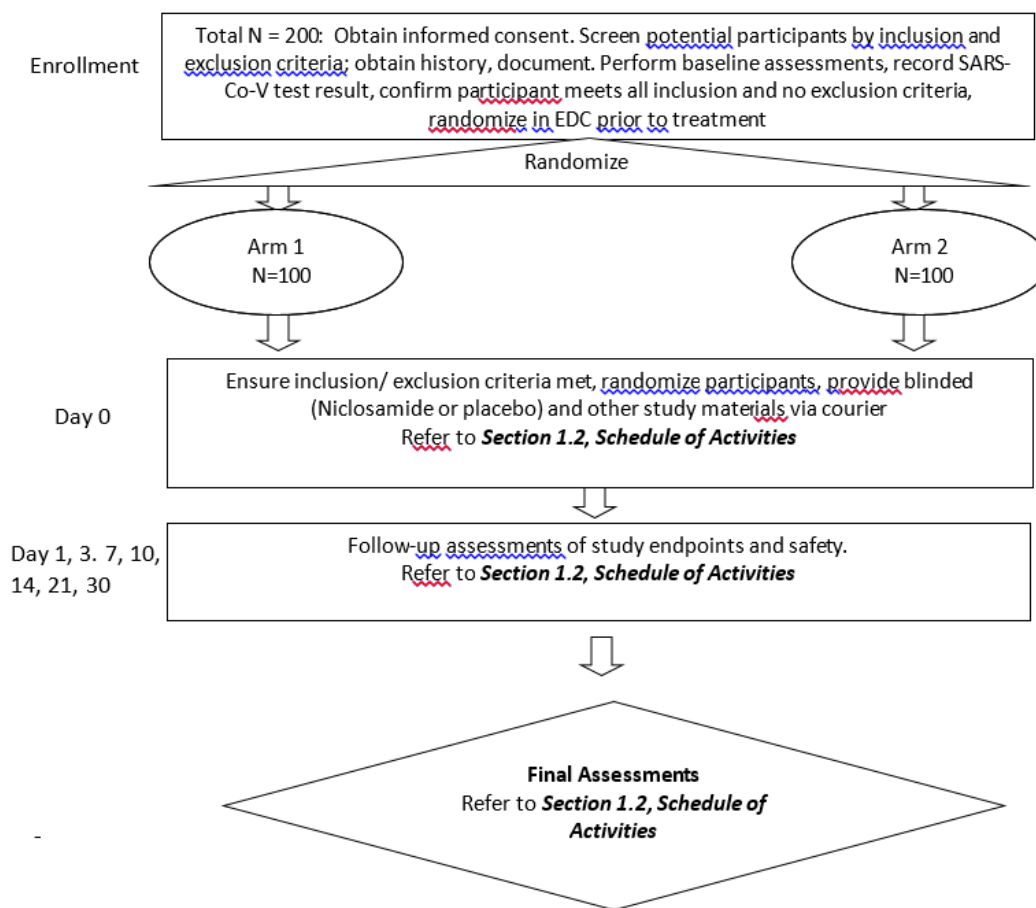

147

148

149

150 1.2 SCHEDULE OF ACTIVITIES (SOA)

151

|                                                                                     | Screen & Baseline Day 0 | Treat Day 1<br>+/- 1 day | Treat Day 2<br>+/- 1 day | Treat Day 3<br>+/- 1 day | Treat Days 4-6<br>+/- 1 day | Post-Treatment Day 7<br>+/- 1 day | Post-Treatment Day 10<br>+/- 1 day | Post-Treatment Day 14 *<br>+/- 1 day | 30-day Safety Call<br>+/- 1 Day |
|-------------------------------------------------------------------------------------|-------------------------|--------------------------|--------------------------|--------------------------|-----------------------------|-----------------------------------|------------------------------------|--------------------------------------|---------------------------------|
| <b>Confirmed COVID-19 + test</b>                                                    | X                       |                          |                          |                          |                             |                                   |                                    |                                      |                                 |
| <b>Medical/ Social History (Demographics)</b>                                       | X                       |                          |                          |                          |                             |                                   |                                    |                                      |                                 |
| <b>Inclusion/ Exclusion Criteria</b>                                                | X                       |                          |                          |                          |                             |                                   |                                    |                                      |                                 |
| <b>Informed Consent</b>                                                             | X                       |                          |                          |                          |                             |                                   |                                    |                                      |                                 |
| <b>Assign Subject ID</b>                                                            | X                       |                          |                          |                          |                             |                                   |                                    |                                      |                                 |
| <b>Randomize</b>                                                                    | X                       |                          |                          |                          |                             |                                   |                                    |                                      |                                 |
| <b>Initiation of Study</b>                                                          |                         |                          |                          |                          |                             |                                   |                                    |                                      |                                 |
| <b>Dose treatment group with 2g niclosamide or placebo</b>                          |                         | X                        | X                        | X                        | X                           |                                   |                                    |                                      |                                 |
| <b>Provide sample collection packet, thermometer, and finger-tip pulse oximetry</b> |                         | X                        |                          |                          |                             |                                   |                                    |                                      |                                 |
| <b>Participant reporting and sample collection</b>                                  |                         |                          |                          |                          |                             |                                   |                                    |                                      |                                 |
| <b>AE reporting</b>                                                                 |                         | X                        | X                        | X                        | X                           | X                                 | X                                  | X                                    | X                               |
| <b>O2 &amp; Temp reporting</b>                                                      |                         | X                        | X                        | X                        | X                           | X                                 | X                                  | X                                    | X                               |
| <b>Oropharyngeal &amp; fecal sample</b>                                             |                         | X<br>(prior to           |                          | X                        |                             | X                                 | X                                  | X                                    |                                 |

|            |  |         |  |  |  |  |  |  |  |
|------------|--|---------|--|--|--|--|--|--|--|
| collection |  | dosing) |  |  |  |  |  |  |  |
|------------|--|---------|--|--|--|--|--|--|--|

152

153 \* An additional AE assessment and fecal specimen will be collected at day 21

154

155

## 2 INTRODUCTION

157

### 2.1 STUDY RATIONALE

159 The ongoing COVID-19 pandemic is an urgent public health crisis with few if any rapid and practical  
160 solutions. The outbreak of COVID-19 has been declared to be a public health emergency of international  
161 concern by the World Health Organization (WHO), and the development of effective therapies for fast-  
162 spreading fatal COVID-19 is in an urgent need. Given the seriousness and time-sensitive nature of this  
163 highly contagious virus, the medical and scientific communities must work quickly and efficiently to find  
164 a feasible way to address this global emergency.

165 Niclosamide is an anthelmintic drug that has been widely used in humans to treat tapeworm infections  
166 for several decades and is currently listed on the WHO List of Essential Medicines, the safest and most  
167 effective medicines needed in a health system. There are no current proven treatments for COVID-19,  
168 and significant efforts are going toward developing novel therapeutics that have not been assessed for  
169 safety in humans. There are a number of existing drugs prescribed for other indications that have  
170 demonstrated potent antiviral activity [1-3]. In a recent study, Niclosamide exhibited antiviral activity  
171 against SARS-CoV-2, the strain responsible for the current COVID-19 pandemic [3]. That niclosamide has  
172 already demonstrated efficacy in specifically inhibiting SARS-CoV-2 replication in vitro is incredibly  
173 promising.

174 A recent study evaluated clinical samples from 73 hospitalized patients with SARS-CoV-2 infection. In 39  
175 of those patients, their fecal samples tested positive for SARS-CoV-2 RNA, with 17 of those patients  
176 remaining SARS-CoV-2-positive in feces after becoming negative in respiratory samples [29]. Taken  
177 together, this suggests that both the commonly accepted route of infection through the respiratory  
178 system as well as the GI tract are implicated in the pathogenesis of COVID-19-related disease  
179 manifestations.

180 While severe acute respiratory syndrome (SARS) coronavirus 2, SARS-CoV-2-infected patients most  
181 commonly present with fever, tiredness and dry cough; a subset of these patients present with  
182 gastrointestinal (GI) issues [2]. Importantly, a recent study found that fecal viral shedding continues  
183 nearly 5 weeks after the last detection of SARS-CoV-2 RNA in respiratory samples, suggesting that the GI  
184 tract serves as a viral reservoir and allows for prolonged COVID-19 infection and transmission [4]. Given  
185 that SARS-CoV-2 is so highly contagious and can be easily spread by both respiratory droplets and fecal-  
186 oral route [5], limiting its transmission is paramount to public health. These data suggest that there is a  
187 critical need to develop practical COVID-19 intervention strategies to treat SARS-CoV-2 infection and to  
188 prevent person-to-person transmission.

189 Repurposing reliable and effective drugs for COVID-19 therapy is not only a safer strategy but will also  
190 allow for more rapid introduction into clinical practice. For this reason, we propose to use the widely  
191 used antihelmintic drug, Niclosamide for treatment of COVID-19.

## 192 2.2 BACKGROUND

193 SARS-CoV-2 has been shown to invade human tissues via the angiotensin converting enzyme II receptor  
194 (ACE2), which is highly expressed on cell types found in various tissues [30]. In a study to identify  
195 potential routes of infection for the SARS-CoV virus corresponding to the outbreak in China in 2002, a  
196 remarkable finding was the high surface expression of ACE2 protein on human lung alveolar epithelial  
197 cells and enterocytes, the simple columnar epithelial cells lining the inner surface of the small and large  
198 intestines[30].

199 This is not the first time that this small molecule (niclosamide) has been proposed as a therapeutic for  
200 this specific application. Shortly after the SARS outbreak in China in 2002-2003, niclosamide was tested  
201 for its potential use as an antiviral medication. Perhaps somewhat surprisingly, niclosamide was found  
202 to inhibit SARS coronavirus, SARS-CoV, in in vitro studies [14]. Later studies went on to evaluate its  
203 potential in combating coronavirus in vivo [31]. Fortunately, the SARS outbreak subsided rather quickly,  
204 and as a result, no future interventions were necessary.

205 Multiple studies have studied the antiviral capacity of niclosamide in treating other similarly structured  
206 pathogenic viruses. During the outbreak of the Zika virus (ZIKV), another positive-sense RNA-based virus  
207 similar to the coronavirus family, Niclosamide was again identified as a potential antiviral therapeutic,  
208 with ZIKV-inhibiting effects both in vitro [13] as well as in a humanized in vivo model of ZIKV-induced  
209 microcephaly [5]. Upon reviewing the literature, we found that niclosamide was also able to inhibit  
210 production of a variety of viral strains [4, 7, 8, 10-12, 15, 32], including adenovirus [10], dengue [4] and  
211 chikungunya virus [11]. Its mechanism of action in this capacity is to increase the pH within acidic  
212 endosomes of host cells, thereby inhibiting virus entry and release.

213 In addition to its antihelmintic and antiviral properties, niclosamide has also demonstrated anti-bacterial  
214 [8, 33, 34], anti-inflammatory [16, 17] and anti-cancer activity [18, 19, 23, 33, 35-40]. Moreover,  
215 niclosamide has also shown promise for treating respiratory illness [14, 18, 20-22] even functioning as a  
216 bronchodilator in an in vivo mouse model of asthma [21, 22].

217 Niclosamide has demonstrated efficacy as a cancer therapeutic in both animal models [19, 36] as well as  
218 human clinical trials [23, 35] which suggests that in addition to potentially being efficacious in this anti-  
219 COVID-19 capacity, Niclosamide is also likely to induce few complications as it is tolerated well even in  
220 immunocompromised cancer patients.

221 In the current pandemic crisis, medical professionals are understandably focused more on stabilizing the  
222 very sick. However, if niclosamide could work in any way to halt or prevent infection in the less sick (or  
223 even in the uninfected), it would be monumental in terms of returning to normal life. Because the drug  
224 is inexpensive and has few if any side effects, taking Niclosamide prophylactically might help to prevent  
225 COVID-19 spreading. Even if this treatment does not completely eradicate infection, niclosamide

226 treatment may help to decrease viral load, thereby allowing the host immune system to better combat  
227 the disease.

## 228 2.3 RISK/BENEFIT ASSESSMENT

### 229 2.3.1 KNOWN POTENTIAL RISKS

230 Niclosamide has been used since mid of the 1960s as an antihelmintic drug which inhibits glucose  
231 uptake, oxidative phosphorylation and anaerobic metabolism. Niclosamide has few side effects and is  
232 known to be well tolerated even when applied over a long period [19]. Reported adverse effects of  
233 Niclosamide are mild and infrequent. This may include GI disturbances, lightheadedness, malaise, and  
234 pruritus. Alcohol may enhance the absorption of niclosamide, increasing the risk of side effects and  
235 therefore should be avoided when taking this drug.

236 Pregnancy and breastfeeding are not exclusion criteria. The FDA categorizes medications based on  
237 safety for use during pregnancy. Five categories - A, B, C, D, and X, are used to classify the possible risks  
238 to an unborn baby when a medication is taken during pregnancy.

239

240 Niclosamide falls into category B:

- 241 • There are no well-done studies that have been done in humans with Niclosamide. But in animal  
242 studies, pregnant animals were given this medication, and the babies did not show any medical issues  
243 related to this medication.
- 244 • Studies in women suggest that this medication poses minimal risk to the infant when used during  
245 breastfeeding.

### 246 2.3.2 KNOWN POTENTIAL BENEFITS

247

248 Niclosamide is an oral medication that has been used to treat tapeworm infestations since 1960[6]. It is  
249 on the World Health Organization (WHO) List of Essential Medicines, the safest and most effective  
250 medicines needed in a health system [6]. In addition to its originally prescribed use, Niclosamide has  
251 been repurposed for a variety of clinical applications. Niclosamide has demonstrated antiviral activity  
252 both in vitro and in vivo on a variety of single stranded RNA-based viral strains [4, 5, 7-13] and even  
253 SARS-CoV, a previous strain of coronavirus associated with the SARS outbreak in China in 2002[14]. Even  
254 more recently, Niclosamide was shown to inhibit SARS-CoV-2, the strain responsible for the current  
255 COVID-19 pandemic [3]. Its mechanism of action in this capacity is to increase the pH within acidic  
256 endosomes of host cells, thereby inhibiting virus entry and release [4, 11, 15]. In addition to its  
257 antihelmintic and antiviral properties, Niclosamide has also demonstrated anti-inflammatory activity  
258 [16, 17], and has shown promise for treating respiratory illness [18-20] even functioning as a  
259 bronchodilator in an in vivo mouse model of asthma [21, 22]. Furthermore, that Niclosamide has been  
260 utilized in a variety of human clinical trials to enhance chemotherapeutics in cancer treatment [19, 23-  
261 25] suggests that is likely to induce few complications as it is tolerated well even in  
262 immunocompromised cancer patients.

263

### 264 2.3.3 ASSESSMENT OF POTENTIAL RISKS AND BENEFITS

265 The primary goal is to maximize patient safety. To fulfill this goal, Tufts and the study team will take  
266 every measure to reduce patient risk of COVID-19-related complications, which includes the following:

- 267 • Reduction of in-patient and outpatient face- to face visits to limit amount of exposure to  
268 patient and related populations
- 269 • Use of a courier service to provide study materials and no pickup and delivery FedEx to obtain  
270 patient samples required for this study
- 271 • Extensive patient screening prior to enrollment to ensure that all enrolled patients meet  
272 inclusion/exclusion criteria; more specifically to avoid enrollment of COVID-19 patients already  
273 severely ill due to this disease. A screening and enrollment log will be maintained.

274 There is no expectation of severe adverse outcomes or reactions due to a patient being treated with  
275 niclosamide. Niclosamide is generally well tolerated and has been prescribed clinically for over 30 years.  
276 Reported AEs in current use are mild and include nausea and diarrhea. All participants will be given  
277 access to contact information of the Study Team, and any adverse reactions will be reported as required  
278 by the protocol.

279

### 280 3 OBJECTIVES AND ENDPOINTS

281

282 The primary objective of this study is to determine if a course of treatment with niclosamide improves  
283 respiratory viral clearance compared to treatment with placebo.

284

285 Secondary objectives include comparing the viral shedding from fecal samples and severity of clinical  
286 outcomes between treatment groups.

287

#### 288 Primary Efficacy Endpoint:

- 289 • Respiratory viral clearance at Day 3.

290

#### 291 Secondary Efficacy Endpoints:

- 292 • Fecal viral clearance at Day 14.
- 293 • Reduction in viral shedding as measured by oropharyngeal swab on days, 3, 7, 10, 14
- 294 • Reduction in fecal viral shedding as measured by fecal PCR on days, 3, 7, 10, 14 and 21
- 295 • Progression to severe COVID, as a composite endpoint defined as O2 saturation <92% on room  
296 air in two consecutive measurements at least 2 hours apart OR requirement of hospitalization  
297 OR need for artificial ventilation OR death.
- 298 • Time to resolution of fever

299 Safety endpoint: incidence of AEs

300

### 301 4 STUDY DESIGN

#### 302 4.1 OVERALL DESIGN

303

304 This is a double-blinded randomized controlled trial of 200 adult outpatients with mild to moderate  
305 symptoms of COVID-19 not requiring hospitalization. Participants will be identified as those reporting to

306 Tufts Medical Center seeking COVID-19 testing. All patients will be provided the option to participate in  
307 our study pending a positive SARS-CoV-2 test result. The Study Team will enroll and randomize patients  
308 into the study after the patient has a confirmed positive test result and meets all the inclusion and none  
309 of the exclusion criteria.

310 Participants in the treatment arm (n= 100) will receive niclosamide 2g orally daily for 7 days in addition  
311 to current standard of care treatment. Those in the control group (n=100) will receive placebo by  
312 mouth in the same numbers of pills on day 1 and daily for 6 more days (total 7 days of treatment) in  
313 addition to current standard of care treatment.

314 Laboratory PCR testing will be performed at Tufts Medical Center laboratory or other CLIA certified lab.  
315 Study participants will be recruited for participation from Tufts Medical Center. Associated sites at  
316 Newton-Wellesley Hospital, Melrose Wakefield and Lowell General Hospital as well as CRN sites will be  
317 included in recruitment and engaged as deemed necessary by the Study Team to ensure identification  
318 and reporting of maximum number of positive cases and prompt patient engagement/ enrollment.

319  
320 A study recruitment brochure will be distributed at the associated Wellforce and CRN sites. A study  
321 poster will be available for affiliated outpatient sites that perform COVID testing. Both will include a QR  
322 code for ease of accessing study information. In addition, nurses who provide results to patients (by  
323 phone) who have tested positive at Tufts Medical Center outpatient will provide basic, scripted study  
324 information to potential participants. This information will include contact information for the Study  
325 Team and has been submitted to the Tufts IRB. Participation at Wellforce and CRN sites will be limited  
326 to distribution of study brochures and display of posters and (on a site by site basis) provision of PHI  
327 (name and contact phone number of potential participants who express interest in the study). This  
328 information will be provided to the Tufts Study Team via a secure, encrypted message. Revisions to the  
329 study brochure or any recruitment material will be provided to the site contact by the Tufts Study Team.  
330 No research activities will be conducted at the associated sites (e.g., informed consent, study visits, data  
331 collection, data entry, data analysis, etc.). All study activity will be conducted by the Tufts Study Team.  
332 The Tufts Study Team will keep record of the site of origin for each enrolled study participant. This de-  
333 identified, aggregated recruitment data will be provided to each site as requested by the site.

334  
335 A study recruitment brochure will be distributed in the community. A study poster will be available for  
336 affiliated outpatient sites that perform COVID testing. Both will include a QR code for ease of accessing  
337 study information. In addition, nurses who provide results to patients (by phone) who have tested  
338 positive will provide basic, scripted study information to potential participants. This information will  
339 include contact information for the Study Team and has been submitted to the Tufts IRB.

340  
341 Potential participants will initially be identified as those reporting to Tufts Medical Center, Wellforce or  
342 CRN outpatient. The Study Team will enroll and randomize patients into the study after the patient has  
343 a confirmed positive test result and meets all the inclusion and none of the exclusion criteria.

344  
345 Participants who provide informed consent and meet all of the inclusion and none of the exclusion  
346 criteria will be randomized on Treatment Day 0 in a 1:1 ratio to either the Treatment Group or the



347 Control Group, in accordance with a computer-generated schedule prepared by a biostatistician. The  
348 randomization schedule will be incorporated into the REDCap Electronic Data Capture (EDC) system.  
349 Randomization will then be performed by study personnel directly in the EDC system. Study personnel  
350 will be instructed not to randomize until participant has been confirmed to meet all inclusion/exclusion  
351 criteria on treatment day 0.

352

#### 353 4.2 SCIENTIFIC RATIONALE FOR STUDY DESIGN

354

355 Randomized double-blind placebo control (RDBPC) studies provide the strongest possible evidence of  
356 causation. Phase II trials are used to determine the efficacy and safety of an intervention in participants  
357 with the disease for which a new intervention is proposed. Randomization in combination with blinding  
358 helps to avoid possible bias in the selection of participants, their assignment to an intervention or  
359 control, and the analysis of their response to the intervention.

360

#### 361 4.3 JUSTIFICATION FOR DOSE

362 The standard oral dosage of Niclosamide prescribed for *Hymenolepis nana* tapeworm infestation (e.g.  
363 adults—maximum of 2 grams/day for seven days) is clinically efficacious in this antiviral capacity. Based  
364 on previous antiviral studies of Niclosamide both in vitro and in vivo [5, 13, 14], the average required  
365 dosage to achieve antiviral activity is 1  $\mu\text{M}$ , which corresponds to  $\sim 0.327 \mu\text{g/ml}$ . In a recent clinical trial  
366 to test efficacy of Niclosamide as an antimetastatic therapy [23, 24], clinicians found that upon oral  
367 intake, Niclosamide  $C_{\text{max}}$  plasma level peaked to a median of  $0.665 \mu\text{g/ml}$  ( ranging from  $0.429$  to  $0.848$   
368  $\mu\text{g/ml}$  ), suggesting that traditional oral drug delivery should be sufficient to inhibit SARS-CoV-2  
369 production. Repeated dosing is commonly used when treating an infection where viruses may (at the  
370 time of ingestion) be at various stages of attachment, invasion, and replication.

371 Importantly, human infections with SARS-CoV-2 have demonstrated two known reservoirs of the virus.  
372 Viremia tends to be relatively uncommon, with viral replication largely occurring in the respiratory and  
373 gastrointestinal systems [37, 38]. The few cases in which SAR-CoV-2 titers are detectable in plasma have  
374 been reported in those patients already progressed to severe disease requiring hospitalization [39].  
375 Plasma levels are limited both by oral absorption, but also by high plasma protein binding. In Bayer  
376 simulations  $C_{\text{max}}$  levels reaching almost  $1200 \text{ nmol/l}$ , or  $1.2 \mu\text{M}$  is predicted. There is 99% plasma  
377 protein binding. Though free drug concentrations may not exceed the  $\text{IC}_{50}$  in plasma, we do not  
378 anticipate viral burden in the plasma to be a significant contributor to disease or spread of virus.

379 While we firmly believe that standard oral delivery of Niclosamide will be sufficient to achieve anti-  
380 COVID-19 activity, it is important to address certain issues previously posed with regard to the  
381 pharmacokinetics of this drug. The inaugural publication describing studies of Niclosamide in human  
382 subjects reported that upon a single oral dose of  $2\text{g}$  carbonyl- $^{14}\text{C}$ -labeled Niclosamide, up to 25% of  $^{14}\text{C}$ -  
383 activity was detected in urine while the remainder was eliminated in feces[31] suggesting that  
384 Niclosamide may be preferentially sequestered in the GI tract. Other studies have also suggested a  
385 similar biodistribution of Niclosamide in the colon[34]. Oral delivery of Niclosamide in mice infected with  
386 an epidemic strain of *Clostridium difficile*, inhibited disease pathogenesis by targeting host mechanisms

387 to prevent pathogen entry into intestinal epithelia without disrupting the endogenous gut  
388 microbiota[34]. With increasing insights emerging into the critical role of GI involvement in COVID-19  
389 severity and transmission, this potential sequestration of Niclosamide in the gut could likely be  
390 beneficial for both treatment strategies as well as prevention of transmission.

391 The second major viral reservoir, the respiratory tract, may be a key site of activity for the niclosamide.  
392 Though lung tissue and epithelial lining fluid concentrations are not available, there is measurable  
393 activity in the respiratory tract. In a transgenic mouse model of asthma, niclosamide treatment (13  
394 mg/kg/day) reduced mucus production, bronchoconstriction, and inflammation of airway tissues.  
395 Assuming the average human weighs approximately 62kg, our dosing strategy of 2g/day, is the  
396 equivalent of approximately 32mg/kg/day, which is significantly higher and likely to have similar effects.  
397 In addition, systemic delivery of niclosamide (20mg/kg) significantly enhanced efficacy of  
398 chemotherapeutic drugs in an in vivo mouse model of non-small cell lung cancer [40], further  
399 demonstrating that niclosamide can specifically target the lung in vivo.

#### 400 4.4 END OF STUDY DEFINITION

401  
402 A participant is considered to have completed the study if he or she has completed all phases of the  
403 study including the last visit or the last scheduled procedure shown in the ***Schedule of Activities, Section***  
404 ***1.2.***

#### 405 **Early Termination/Hospitalization**

406  
407 All participants have the right to withdraw from study participation at any time during the study. If, for  
408 whatever reason, a participant withdraws from the study or is hospitalized for increased severity of  
409 COVID symptoms or other cause, an ***Early Termination Visit*** will be performed as deemed feasible by  
410 the PI or physician Investigator.

411  
412 Any AE, SAE or other medical condition or situation that occurs such that continued participation in the  
413 study would not be in the best interest of the participant will result in early termination.

414  
415 The following procedures will be performed at the ***Early Termination Visit***:

- 416 • Assess for AEs
- 417 • Assess for complications following treatments
- 418 • Document all current medications, including medications over the counter and herbal  
419 medications
- 420 • Perform clinical assessment (as deemed feasible if hospitalized)
- 421 • Evaluate for increased severity of COVID-19-related disease

422  
423 If clinical evaluation is deemed not feasible due to patient condition, the Study Team will collect as much  
424 of the ***Early Termination Visit*** data via the Electronic Medical Record as is available.

## 425 5 STUDY POPULATION

## 427 5.1 INCLUSION CRITERIA

428

429 In order to be eligible to participate in this study, an individual must meet all the following criteria:

- 430 • SARS-CoV-2 infection confirmed by PCR  $\leq$  3 days before randomization
- 431 • Provision of informed consent
- 432 • Stated willingness to comply with all study procedures and availability for the duration of the
- 433 study
- 434 • Male or female, over 18 years of age
- 435 • No need for oxygen supplementation
- 436 • No requirement for hospitalization at the time of enrollment
- 437 • Ability to take oral medication and be willing to adhere to the Niclosamide/placebo regimen

438

## 439 5.2 EXCLUSION CRITERIA

440

441 An individual who meets any of the following criteria will be excluded from participation in this study:

- 442 • Known allergic reactions to components of the niclosamide
- 443 • Participation in another trial or use of any experimental treatment for COVID-19, including
- 444 chloroquine, hydroxychloroquine, remdesivir, and lopinavir/ritonavir
- 445 • History of receipt of COVID-19 vaccine\*
- 446 • Current hospitalization or requiring hospital admission at screening

447

448 \* If a participant is enrolled in the study and then subsequently has an appointment for the COVID-19  
449 vaccine, they will remain on study and will be advised that they can keep their vaccine appointment.  
450 Vaccine administration will be noted and considered in the final data analysis.

451

## 452 5.3 LIFESTYLE CONSIDERATIONS

453

454 No special preparations or additional steps (for example, special diets, fasting, other medicines,  
455 laxatives, or enemas) are necessary before, during, or immediately after taking niclosamide. Participants  
456 are advised to avoid alcohol consumption during the study treatment period.

457

## 458 5.4 SCREEN FAILURES

459

460 Screen failures are defined as participants who consent to participate in the clinical trial but are not  
461 subsequently randomly assigned to the study intervention or entered in the study. A minimal set of  
462 screen failure information is required to ensure transparent reporting of screen failure participants, to  
463 meet the Consolidated Standards of Reporting Trials (CONSORT) publishing requirements and to  
464 respond to queries from regulatory authorities. Minimal information includes demography, screen  
465 failure details, eligibility criteria, and any SAE.

466

## 467 5.5 STRATEGIES FOR RECRUITMENT AND RETENTION

468  
469 Participants will be identified as those outpatients reporting to Tufts Medical Center, Wellforce or our  
470 CRN sites seeking COVID-19 testing. Any asymptomatic patient and those with mild to moderate COVID-  
471 19 symptoms not requiring hospital admission or supplemental oxygen, will be provided the option to  
472 participate in our study once they have a reported positive SARS-CoV-2 test result. Lowell General, St.  
473 Elizabeth's, Newton Wellesley Hospital, Maine Medical Center and New England Quality Care Alliance  
474 (NEQCA) have agreed to distribute our study brochure at the time of testing at their drive thru testing  
475 and ambulatory locations. These sites will also be displaying our study poster (with QR code) in the ED,  
476 Primary Care clinics. Additional Wellforce and CRN sites may be used to enhance recruitment. Study  
477 brochures and promotional material will be given to potential participants at each of the testing sites  
478 including study team contact information. The study brochure will be given to the patient at the time of  
479 COVID- 19 testing, by the testing site personnel. The participant will proactively contact the study team  
480 if interested in participation following a positive COVID-19 test.

481  
482 The Study Team will enroll and randomize patients meeting the above criteria into the study after the  
483 patient has a confirmed positive test result and meets all of the inclusion and none of the exclusion  
484 criteria.

485  
486 Tufts Community Health Improvement Program will incorporate the distribution of study material  
487 (brochure) with their general COVID-19 materials within the Chinatown community and residential  
488 towers. The Tufts Medical Center (TMC) Symptom Clinic, staffed by TC registered nurses (RNs), will be  
489 contacting patients who test positive by phone. The RN will give a brief (scripted) overview of the study  
490 and contact information for the study team at the time of call to provide testing result.

491  
492 Social media will be used to enhance recruitment. This study will be listed at [www.clinicaltrials.gov](http://www.clinicaltrials.gov).

493  
494 Participants will be offered twenty dollars (\$20) for time and effort (via ClinCard) at each specimen  
495 collection timepoint (Days 1, 3, 7, 10, 14 and 21).

496  
497 All research activity including Informed Consent will be performed by Tufts Medical Center employees.

## 6 STUDY INTERVENTION

### 6.1 STUDY INTERVENTION(S) ADMINISTRATION

#### 6.1.1 STUDY INTERVENTION DESCRIPTION

502  
503  
504 Informed Consent will be obtained, all the inclusion and none of the exclusion criteria are met.

505  
506 In addition to niclosamide or placebo treatments, all enrolled patients will be provided a home  
507 thermometer as well as a fingertip probe pulse oximeter, with the specific instructions to monitor both  
508 temperature at oxygen saturation at the time of daily oral administration of drug. The relatively low

509 reported percentage of error for the finger probe supports that the finger probe is the modality of  
510 choice to measure intermittent oxygen saturation in the outpatient setting.

511

512 Oropharyngeal and fecal swabs will be collected at days 1 (baseline), 3, 7, 10, and 14 of the study. An  
513 additional fecal specimen will be collected at day 21. In the case of oropharyngeal samples, care will be  
514 taken to ensure that sampling methods are consistent for each individual patient across all included  
515 timepoints, to limit any bias due to potential differences in viral load.

516

517 Oropharyngeal collection is minimally invasive and can reliably be self-administered. Recent research  
518 testing SARS-CoV-2 detection, nasopharyngeal and oropharyngeal (saliva) samples from confirmed  
519 SARS-CoV-2 found that oropharyngeal yielded greater detection sensitivity and consistency throughout  
520 the course of infection. Less variability in self-sample collection was also found. This research  
521 demonstrated that oropharyngeal samples are a viable and more sensitive alternative to  
522 nasopharyngeal swabs and can enable at-home self-administered sample collection for accurate SARS-  
523 CoV-2 testing [41, 42].

524

525 The collection of oropharyngeal samples will be directly observed by a Study Team member via the  
526 telehealth platform. The participant will open the viral transport kit and swab the back of the throat and  
527 tonsil area (avoiding mouth, teeth, and gums) and place to swab back into the vial. For fecal specimen,  
528 the participant will swab feces from a plastic container (or wrap) placed on the toilet seat. Printed  
529 instructions will be provided to each participant with detail on how to collect both the oropharyngeal  
530 and fecal specimens. These instructions will also be reviewed with the participant by a member of the  
531 Study Team.

532

533 Once obtained, samples will be transported by no contact pickup and delivery FedEx service to the Tufts  
534 Medical Center or CLIA- certified lab to prevent unnecessary hospital visits and to encourage compliance  
535 given the self-quarantine status of enrolled patients.

536

### 537 **Telemedicine Platform**

538

539 A HIPPA compliant telehealth platform; e.g., Doximity, will be used to conduct remote study visits.

540

541 Twice daily a list of COVID-19 positive patients will be generated by the Tufts Medical Center lab and  
542 provided to the Study Team via a secure Tufts email account. Upon receiving the COVID-19 positive test  
543 notification, COVID-19 positive participants will be approached remotely by a study Investigator for  
544 remote (telephone) Informed Consent. Once consent is obtained, all the  
545 and none of the exclusion criteria are met, the study CRC will engage with the participant to enroll them  
546 in the telehealth platform and schedule the follow-up telehealth study appointments.

547

548 If the participant does not have a Smartphone, one will be provided to them along with the other study  
549 materials. A prepaid USPS envelope with additional instructions will be provided to send the package  
550 through the USPS for return. Participants will be guided thru the step-by-step telemedicine setup on  
551 their Smartphone by the study CRC. Scripted guidance will be provided to the study CRCs to ensure that

552 instructions provided to participants are consistent. For example, included in the script, the study CRC  
553 will provide instruction in simple, easy to understand language such as, “I am going to take a minute and  
554 walk you through signing up for the app so you are ready on your visit date. “I’ve have actually gone  
555 ahead and scheduled the visit for you in the app”. The app is navy blue, has a picture of a doctor with a  
556 stethoscope and lighter blue heart”. Once set up, a reminder of the upcoming appointment will be sent  
557 to the participant via email and text message.

558  
559 Once the participant “checks- in” for their study visit, the CRC, investigator, or Study Team member will  
560 receive a notice that the participant is in the *Waiting Room*. A family member or other support person  
561 of the participant’s choice can be included in any/all visits via Facetime. More than one study team  
562 member can also join the appointment as needed or desired with the “Add Person” Facetime  
563 number/address. Once the study team enters the *Waiting Room*, a split screen clearly displays the  
564 patient, support person and the study team member(s).

## 565 6.1.2 DOSING AND ADMINISTRATION

566  
567 Participants eligible for the study will review and undergo informed consent at the time they receive  
568 confirmation of positive SARS-CoV-2 test result. After obtaining consent, participants will be randomly  
569 assigned on a 1:1 basis to receive:

- 571 • **Treatment Group blinded:** Will receive niclosamide 2g orally daily for 7 days in addition to  
572 current standard of care
- 573 • **Control Group blinded:** Will receive placebo by mouth daily for 7 days in addition to current  
574 standard of care

575  
576 Niclosamide may be taken on an empty stomach (either 1 hour before or 2 hours after a meal).  
577 However, to prevent stomach upset, it is best taken after a light meal (for example, breakfast).  
578 Participants will be advised to avoid alcohol consumption during study treatment period.

## 580 6.2 PREPARATION/HANDLING/STORAGE/ACCOUNTABILITY

### 581 6.2.1 ACQUISITION AND ACCOUNTABILITY

582  
583 In accordance with recent COVID-19 FDA Guidance, if scheduled visits at clinical sites are significantly  
584 impacted, certain IP, such as those that are typically distributed for self-administration, may be  
585 amenable to alternative secure delivery methods. As such:

586  
587 Niclosamide and placebo (Investigational Product, IP) will be stored in the Tufts Medical Center  
588 Investigational Pharmacy. Upon enrollment, the investigational pharmacy will package and dispense the  
589 IP to the patient, along with the sampling kit. The entire supply of study medication will be dispensed at  
590 one time. It will be delivered to the subject via courier service. Subjects will be asked to document  
591 compliance with study protocol in a subject diary. If a subject does not use all the IP, the remainder  
592 shall be returned to the study investigators with the day 14 samples. The IP will then be returned to the  
593 manufacturer or destroyed on site.

594

595 Investigational new drug application (IND) submitted under section 505(i) of the Federal Food, Drug, and  
596 Cosmetic Act (FDCA) for Niclosamide chewable tablets, 500 mg has been approved: FDA IND # 151423.

597

598 Placebo manufacturer KABS Laboratories Inc. See Appendix A for manufacturing detail.

599

600

---

#### 601 6.2.2 FORMULATION, APPEARANCE, PACKAGING, AND LABELING

602

603 Niclosamide will be provided as 500 mg chewable tablets. They are gray-yellow round tablets with FE  
604 printed on one side and the “Bayer Cross” on the other side. The excipients include: corn starch, talc,  
605 sodium lauryl sulphate, povidone, vanillin, magnesium stearate, saccharin sodium. They will be  
606 provided in blister packages for ease of use and enhanced stability. They will be labeled as “Niclosamide  
607 OR Placebo,” with adequate administration instructions prior to dispensing to subjects.

608

---

#### 609 6.2.3 PRODUCT STORAGE AND STABILITY

610

611 Niclosamide and the placebo are oral tablets. They can be stored at room temperature, 25°C (77°F) with  
612 excursions permitted to 15-30°C (59-86°F). They will be dispensed in blinded blister packaging.

613

---

#### 614 6.2.4 PREPARATION

615 There will be no significant preparation. Both niclosamide and placebo tablets will be dispensed in  
616 blinded blister packages and labeled in accordance with state and federal regulation.

---

### 617 6.3 MEASURES TO MINIMIZE BIAS: RANDOMIZATION AND BLINDING

618

619 Participants who sign informed consent and meet all inclusion and exclusion criteria will be randomized  
620 on Treatment Day 0 in a 1:1 ratio to either the Treatment Group or the Control Group, in accordance  
621 with a computer-generated schedule prepared by a biostatistician. The randomization schedule will be  
622 incorporated into the REDCap EDC system. Randomization will then be performed by study personnel  
623 directly in the EDC system. Study personnel will be instructed not to randomize until participant has  
624 been confirmed to meet all inclusion/exclusion criteria on treatment day 0.

625

626 As all members of the Study Team will be blinded, Tufts Investigational Drug Services (IDS) will be  
627 unblinded and will dispense both the Niclosamide and placebo. The study intervention (niclosamide)  
628 and placebo will be packaged and as indistinguishable as possible.

629

630 Refer to **Section 9, Statistical Considerations** for sample size calculations.

631

---

### 632 6.4 STUDY INTERVENTION COMPLIANCE

633 During the *Baseline and Screening (Day 0)*, the Principal Investigator (PI) or a co-Investigator will review  
634 the study with the participant and obtain informed consent and Health Insurance Portability and

635 Accountability Act of 1996 (HIPAA) authorization. A second member of Study Team (e.g., the study  
636 Clinical research coordinator (CRC)) will serve as a witness to the informed consent. After the informed  
637 consent is obtained, the participant will be assigned a unique enrollment number. The subject will then  
638 be randomized to treatment in EDC and provided blinded treatment (either Niclosamide or placebo) and  
639 other study materials via courier.

640 On **Treatment Day 1**, a member of the Study Team or study CRC will review the dosing and schedule of  
641 Niclosamide/ placebo.

- 642 • The patient will be instructed to record all doses in Study Drug Administration Diary
- 643 • During each telehealth visit, the study CRC or other Study Team member will review the diary  
644 with the participant
- 645 • The participant will be advised not to discard any study pill bottles
- 646 • Baseline AEs, O2 saturation, temperature, oropharyngeal & fecal sample collection will be  
647 obtained

648

649 Refer to the **Section 1.2, Schedule of Activities**.

650

## 651 6.5 CONCOMITANT THERAPY

652

653 Concomitant therapies are any new or existing medications or therapy taken by the patient including:

- 654 • Drugs, including but not limited to, prescription, over the counter, birth control  
655 pills/patches/hormonal devices, and homeopathic preparations
- 656 • Nondrug therapies, including but not limited to, thermal/laser/radiation procedures, vitamins,  
657 herbal medicines/supplements.

658

659 During the Screening process, information on all concomitant therapies, medications, and procedures  
660 will be recorded in the source documents and appropriate Case Report Form (CRF) along with the  
661 diagnosis or reason for use. Once the patient receives the first dose of study drug, recording of  
662 concomitant therapies will be limited to any new medication or modification of an existing medication  
663 taken for treatment of an AE. These therapies will be recorded in the source documents and appropriate  
664 CRF along with the diagnosis or reason for use. Those therapies used for the treatment of an adverse  
665 event are to be linked to an AE and documentation of the AE must also be completed

666

### 667 6.5.1 RESCUE MEDICINE

668 The study site will not supply rescue medication.

669

## 670 7 STUDY INTERVENTION DISCONTINUATION AND PARTICIPANT 671 DISCONTINUATION/WITHDRAWAL.

### 672 7.1 DISCONTINUATION OF STUDY INTERVENTION

673

674 This study may be temporarily suspended or prematurely terminated if there is enough reasonable  
675 cause. Written notification, documenting the reason for study suspension or termination, will be



676 provided by the suspending or terminating party to the study team, the Sponsor and the Institutional  
677 Review Board (IRB), as appropriate. If the study is prematurely terminated or suspended, the study  
678 team will promptly inform the IRB and will provide the reason(s) for the termination or suspension.  
679

680 Discontinuation from niclosamide does not mean discontinuation from the study, and remaining study  
681 procedures should be completed as indicated by the study protocol. If a clinically significant finding is  
682 identified (including, but not limited to changes from baseline) after enrollment, the investigator or  
683 qualified designee will determine if any change in participant management is needed. Any new clinically  
684 relevant finding will be reported as an AE.  
685

## 686 7.2 PARTICIPANT DISCONTINUATION/WITHDRAWAL FROM THE STUDY

687 All participants are free to withdraw from participation at any time, for any reason, specified or  
688 unspecified, and without prejudice. Reasonable attempts will be made by the Investigator to provide a  
689 reason for participant withdrawals. The reason for the participant's withdrawal from the study will be  
690 specified in the participant's source documents and the CRF. The study team will make every effort to  
691 contact participants who are lost to follow-up. Attempts to contact such participants will be  
692 documented in the participant's records (e.g., times and dates of attempted telephone contact, receipt  
693 for sending a registered letter, etc.).  
694

695 A participant will be discontinued from the study for the following reasons only:

- 696 • Participant withdrawal of consent
- 697 • Lost to follow-up
- 698 • Participant death
- 699 • Hospitalization for severe COVID- 19 symptoms

700 The following procedures will be performed at the **Early Termination visit**:

- 701 • Assess for AEs
- 702 • Assess for complications following treatments
- 703 • Document all current medications, including medications over the counter and herbal  
704 medications
- 705 • Perform clinical assessment (as deemed feasible if hospitalized)
- 706 • Evaluate for increased severity of COVID-19-related disease  
707

708 If clinical evaluation is deemed not feasible due to patient condition, the Study Team will collect as much  
709 **Early Termination Visit** data as possible from the Electronic Medical Record  
710

711 The reason for participant discontinuation or withdrawal from the study will be recorded on the CRF.  
712

## 713 7.3 LOST TO FOLLOW-UP

714

715 A participant will be considered lost to follow-up if he or she fails to complete more than (2) scheduled  
716 telehealth visits and is unable to be contacted by the study staff.

717

718 The following actions must be taken if a participant fails to attend a required telehealth visit:

- 719 • The Study Team will attempt to contact the participant and reschedule the missed visit and  
720 counsel the participant on the importance of maintaining the assigned visit schedule and  
721 ascertain if the participant wishes to and/or should continue in the study.
- 722 • Before a participant is deemed lost to follow-up, the investigator or designee will make every  
723 effort to regain contact with the participant (where possible, 3 telephone calls and, if necessary,  
724 a certified letter to the participant's last known mailing address or local equivalent methods).  
725 These contact attempts will be documented in the participant's medical record or study file.
- 726 • Should the participant continue to be unreachable, he or she will be considered to have  
727 withdrawn from the study with a primary reason of lost to follow-up.
- 728 • For participants considered lost to follow-up, the CRF will be completed up to the last contact  
729 with the participant.

730

## 731 8 STUDY ASSESSMENTS AND PROCEDURES

### 732 8.1 EFFICACY ASSESSMENTS

733

734 The specific timing of procedures/evaluations to be done at each study visit are found in **Section 1.2,**  
735 **Schedule of Activities.** All assessment will be performed by the study investigators or a qualified  
736 member of the study team.

737

#### 738 **Baseline and Screening (Day 0)**

739 The following procedures will be performed at the Baseline/Screening visit:

- 740 • Review the study with the participant and obtain written informed consent and Health  
741 Insurance Portability and Accountability Act of 1996 (HIPAA) authorization
- 742 • Assign the participant a unique enrollment number
- 743 • Review and record medical history, surgical history, and medication history to determine  
744 eligibility based on inclusion/exclusion criteria
- 745 • Record smoking history
- 746 • Record demographics (age, race, ethnicity, gender)
- 747 • Document all current medications, including medications over the counter and herbal  
748 medications
- 749 • Record COVID symptoms, if symptomatic
- 750 • Record confirmation of positive SARS-CoV-2 test result
- 751 • Record number of days since onset of symptoms, if symptomatic

#### 752 **Randomization and Treatment (Day 0)**

- 753 • Confirm patient meets all inclusion and none of the exclusion criteria
- 754 • Randomize subject to treatment in EDC

- 755       • Provide blinded treatment (either niclosamide or placebo) and other study materials via courier  
756

757 **Follow-Up Evaluation**

758 Remote clinical follow-up will occur at the following time points: Days 1, 2, 3, 7, 10, 14, 21 and 30.

759 The following procedures will be performed at all follow-up visits, expected to be done by tele-medical  
760 methods, unless otherwise noted:

- 761       • Assess for AEs  
762       • Assess COVID signs and symptoms  
763       • Document all current medications, including medications over the counter and herbal  
764       medications  
765       • Document patient’s status as an outpatient, subsequently hospitalized, or died  
766       • Perform clinical assessment by patient report and vital signs (temperature and oxygen  
767       saturation)  
768       • Evaluate for increased severity of COVID-19-related disease  
769       • Collect temperature and oximetry data daily, with the caveat that if O2 goes below 92%, an  
770       addition oximeter reading should be taken 2 hours later. If the follow-up O2 saturation remains  
771       below 92%, the participant will be referred to their Primary Care Physician (PCP) or to the local  
772       Emergency Department.  
773       • Collect oropharyngeal swab samples for viral shedding on days 1, (baseline), 3, 7, 10, 14 (courier  
774       transport of specimen)  
775       • Collect fecal samples for viral shedding as measured by fecal PCR on days 1, (baseline), 3, 7, 10,  
776       14 and 21 (courier transport of specimen)  
777

778 **Final Study Visit (Non-hospitalized Participants)**

779 The following procedures will be performed at the final post treatment visit:

- 780       • Assess for AEs  
781       • Assess for complications following treatments  
782       • Document all current medications, including medications over the counter and herbal  
783       medications  
784       • Perform clinical assessment to evaluate for increased severity of COVID-19-related diseases  
785

786 **Early Termination/Hospitalization**

787 All participants have the right to withdraw from study participation at any time during the study. If, for  
788 whatever reason, a participant withdraws from the study or is hospitalized, an **Early Termination Visit**  
789 will be performed.  
790

791 The following procedures will be performed at the **Early Termination Visit**:

- 792       • Assess for adverse events  
793       • Assess for complications following treatments  
794       • Document all current medications, including medications over the counter and herbal  
795       medications  
796       • Perform clinical assessment (as deemed feasible if hospitalized)

- 797 • Evaluate for increased severity of COVID-19-related disease

798

799 If clinical evaluation is deemed not feasible due to patient condition, the Study Team will collect **Early**  
800 **Termination Visit** data via the Electronic Medical Record.

801 A 30-day follow-up call and AE assessment for those patients who are hospitalized will be performed.

## 802 8.2 SAFETY AND OTHER ASSESSMENTS

803

804 For Study procedures and evaluations to be done as part of the study to monitor safety and support the  
805 understanding of the study intervention's safety refer to **Section 1.2, Schedule of Activities and Section**  
806 **8.1 Study Assessments.**

807

## 808 8.3 ADVERSE EVENTS AND SERIOUS ADVERSE EVENTS

809

810 Adverse event data will be summarized for all participants in the safety population. Site-reported serious  
811 adverse events and unexpected adverse drug reactions will be summarized as participant-based counts  
812 and percentages by AE category. MedDRA system organ class and preferred term In addition, participant  
813 listings will be provided for serious, unexpected, and unanticipated adverse reactions. Any adverse  
814 events leading to discontinuation of study drug or death will also be listed for all participants.

815

### 816 **Definition of Adverse Event (AE)**

817 An AE is defined as any unanticipated medical occurrence regardless to relationship of the investigative  
818 arm of the trial. An AE can be any unintended sign, lab abnormality, symptom, or disease associated  
819 with the trial. Any abnormality that presents during a medical test are to be defined as an AE if it  
820 produces clinical signs and/or symptoms, requires intervention, or deemed clinically significant by the  
821 Investigator.

822

823 The *Common Terminology Criteria for Adverse Events (CTCAE) version 5.0* will be utilized for AE reporting  
824 the following study- specific AEs:

- 825 • Cough
- 826 • Dyspnea
- 827 • Hypoxia
- 828 • Nausea
- 829 • Vomiting
- 830 • Abdominal pain
- 831 • Pruritus
- 832 • Loss of appetite
- 833 • Dizziness
- 834 • Skin rash

835

### 836 **Definition of Serious Adverse Event (SAE)**

837

838 **An AE is considered serious if it results in any of the following:**

- 839
- 840 • results in death;
  - 841 • is life-threatening (places the subject at immediate risk of death from the event as it occurred);
  - 842 • requires inpatient hospitalization or prolongation of existing hospitalization;
  - 843 • results in a persistent or significant disability/incapacity;
  - 844 • results in a congenital anomaly/birth defect; or
  - 845 • any other adverse event that, based upon appropriate medical judgment, may jeopardize the  
846 subject's health and may require medical or surgical intervention to prevent one of the other  
847 outcomes listed in this definition

847

848 **Definition of Unexpected Adverse Reaction (UAE)**

849 An adverse reaction, the nature or severity of which is not consistent with the applicable product  
850 information (e.g. Product Information/Summary of Product Characteristics). This would include any SAE  
851 on health or safety, any life-threatening problem or death caused by, or associated with a drug; or any  
852 other unanticipated serious problem associated with a drug that relates to the rights, safety, or welfare  
853 of subjects.

854

855 **8.3.1 CLASSIFICATION OF AN ADVERSE EVENT.**

856 **8.3.1.1 SEVERITY OF EVENT**

857

858 All AEs will be assessed by the study clinician using the CTCAE V. 5.0

- 859
- 860 • Grade 1: Mild; asymptomatic or mild symptoms; clinical or diagnostic observations only;  
intervention not indicated.
  - 861 • Grade 2: Moderate; minimal, local or noninvasive intervention indicated
  - 862 • Grade 3: Severe or medically significant but not immediately life-threatening; hospitalization or  
863 prolongation of hospitalization indicated

864

865 **8.3.1.2 RELATIONSHIP TO STUDY INTERVENTION**

866 A Study Team physician will oversee the evaluation of patient reported severity of AEs using the  
867 following categories:

868 **Relationship to Study Products**

869 All AEs must have their relationship to study intervention assessed by the clinician who examines and  
870 evaluates the participant based on temporal relationship and his/her clinical judgment. The degree of  
871 certainty about causality will be graded using the categories below.

872

|                    |                                                                                                                                                       |
|--------------------|-------------------------------------------------------------------------------------------------------------------------------------------------------|
| <b>Definitely:</b> | The relationship of the AE and the drug or the study procedure can be established.                                                                    |
| <b>Probably:</b>   | While a clear relationship to the drug or to the study procedure cannot be established, the AE is associated with an expected AE or there is no other |

|                   |                                                                                                                                                                                                                                                                         |
|-------------------|-------------------------------------------------------------------------------------------------------------------------------------------------------------------------------------------------------------------------------------------------------------------------|
|                   | medical condition or intervention, which could explain the occurrence of such an event.                                                                                                                                                                                 |
| <b>Possibly:</b>  | There is no clear relationship between the AE and the drug or study procedure; however, one cannot conclude that there is no relationship.                                                                                                                              |
| <b>Unrelated:</b> | There is no relationship between the AE and the drug or study procedure. This may include but is not limited to the incident being an expected outcome of a previously existing or concurrent disease, concomitant medication or procedure the participant experienced. |

873

874

---

### 8.3.1.3 EXPECTEDNESS

875 Study Team members who are clinically qualified (e.g., a physician co- Investigator) will be responsible  
876 for determining whether an AE is expected or unexpected. An AE will be considered unexpected if the  
877 nature, severity, or frequency of the event is not consistent with the risk information previously  
878 described for the study products. This information will be provided to the IRB, to the Study Sponsor, and  
879 to any relevant governmental agency with regulatory or public health authority.

880

---

### 8.3.2 TIME PERIOD AND FREQUENCY FOR EVENT ASSESSMENT AND FOLLOW-UP

881

882 The occurrence of an AE or SAE may come to the attention of study personnel during study visits and  
883 interviews of a study participant presenting for medical care.

884

885 All AEs including local and systemic reactions not meeting the criteria for SAEs will be captured on the  
886 appropriate CRF. Information to be collected includes event description, time of onset, clinician's  
887 assessment of severity, relationship to study product (assessed only by those with the training and  
888 authority to make a diagnosis), and time of resolution/stabilization of the event. All AEs occurring while  
889 on study must be documented appropriately regardless of relationship. All AEs will be followed to  
890 adequate resolution.

891

892

---

### 8.3.3 ADVERSE EVENT REPORTING

893 Adverse event data will be summarized for all participants in the safety population. Serious adverse  
894 events and unexpected adverse drug reactions will be summarized as participant-based counts and  
895 percentages by AE category. In addition, participant listings will be provided for serious, unexpected,  
896 and unanticipated adverse reactions. Any adverse events leading to discontinuation of study drug or  
897 death will also be listed for all participants.

898

899

---

### 8.3.4 SERIOUS ADVERSE EVENT REPORTING

900

901 Study team members who are qualified will immediately report any serious adverse event, whether or  
902 not considered study intervention related, including those listed in the protocol and must include an

903 assessment of whether there is a reasonable possibility that the study intervention caused the event.  
904 Study endpoints that are SAEs must be reported in accordance with the protocol.

905

---

### 906 8.3.5 REPORTING EVENTS TO PARTICIPANTS

907

908 AEs, SAEs and UPs will be reported to IRB as outlined in Sections 8.3.5, 8.3.6 and 8.4.2

909

---

### 910 8.3.6 EVENTS OF SPECIAL INTEREST

911

912 N/A

913

---

### 914 8.3.7 REPORTING OF PREGNANCY

915

916 During the Informed Consent discussion, the MD study Investigator will ask women of childbearing  
917 potential if they are pregnant. That yes/ no response will be recorded. We will not exclude women who  
918 are of childbearing years or pregnant. We will collect pregnancy status information at the time of  
919 enrollment. Niclosamide is a Category B (animal studies show no risks, but there are no controlled  
920 studies in pregnant women). Category B drugs include prenatal vitamins, acetaminophen and several  
921 other medications used routinely and safely during pregnancy.

922

923 In addition to recording whether women of childbearing age are pregnant at the time of study  
924 enrollment, we will also record their breastfeeding status. For enrolled subjects who are pregnant or  
925 breastfeeding, we will include follow up a specific query for any adverse effects on pregnancy and/or  
926 breastfeeding infant during the course of the study.

927

---

## 928 8.4 UNANTICIPATED PROBLEMS

---

### 929 8.4.1 DEFINITION OF UNANTICIPATED PROBLEMS (UP):

930

931 The Office for Human Research Protections (OHRP) considers unanticipated problems involving risks to  
932 participants or others to include, in general, any incident, experience, or outcome that meets **all** the  
933 following criteria:

934

- 935 • Unexpected in terms of nature, severity, or frequency given (a) the research procedures that are  
936 described in the protocol-related documents, such as the Institutional Review Board (IRB)-  
937 approved research protocol and informed consent document; and (b) the characteristics of the  
938 participant population being studied;
- 939 • Related or possibly related to participation in the research (“possibly related” means there is a  
940 reasonable possibility that the incident, experience, or outcome may have been caused by the  
941 procedures involved in the research); and
- 942 • Suggests that the research places participants or others at a greater risk of harm (including  
943 physical, psychological, economic, or social harm) than was previously known or recognized.

944

---

### 945 8.4.2 UNANTICIPATED PROBLEM REPORTING

946

947 The investigator will report unanticipated problems (UPs) to the reviewing Institutional Review Board  
948 (IRB). The UP report will include the following information:

949

950• Protocol identifying information: protocol title and number, PI's name, and the IRB project number;

- 951 • A detailed description of the event, incident, experience, or outcome;
- 952 • An explanation of the basis for determining that the event, incident, experience, or outcome  
953 represents an UP;
- 954 • A description of any changes to the protocol or other corrective actions that have been taken or  
955 are proposed in response to the UP.

956

957 To satisfy the requirement for prompt reporting, UPs will be reported using the following timeline:

- 958 • UPs that are SAEs will be reported to the IRB within 5 working days of the investigator becoming  
959 aware of the event.
- 960 • A Study Team evaluation of an UP will be performed with a report of results of such evaluation  
961 will be provided to the reviewing IRB by the PI within 5 working days.
- 962 • All other Reportable New Information will be reported to the IRB as per the policy.

963

---

#### 964 8.4.3 REPORTING UNANTICIPATED PROBLEMS TO PARTICIPANTS

965

966 AEs, SAEs and UPs will be reported to IRB as outlined in Sections 8.3.5, 8.3.6 and 8.4.2

967

## 968 9 STATISTICAL CONSIDERATIONS

### 969 9.1 STATISTICAL HYPOTHESES

970

971 The null hypothesis is that the proportion of participants with respiratory viral clearance at Day 3 is the  
972 same in both treatment groups. The alternative hypothesis is that they are different.

973

974

### 975 9.2 SAMPLE SIZE DETERMINATION

976

977 For the primary efficacy endpoint of respiratory virologic clearance at Day 3 measured by oropharyngeal  
978 viral shedding we assume that on Day 3, 50% of participants in the niclosamide group who have a  
979 positive result on Day 1 (prior to dosing) will have a negative test results and 15% in the placebo group.  
980 With 40 participants per group we have 89% power to show a statistically significant difference  
981 between groups at Day 3 using Fisher's Exact test at the two-sided 0.05 significance level. Assuming that  
982 40% of randomized participants have a positive respiratory test result, 200 participants will be required  
983 to be randomized into the study.

984

### 985 9.3 POPULATIONS FOR ANALYSES

986

- 987 • Intention-to-Treat (ITT) Analysis Dataset (all randomized participants)



- 988 • Modified Intention-to-Treat Analysis Dataset (participants who took at least one dose of study  
989 intervention, have a positive test result on Day 1 and have Day 3 oropharyngeal sample results  
990 available for analysis.
- 991 • Safety Analysis Dataset: participants who took at least one dose of study intervention
- 992 • Per-Protocol Analysis Dataset: subset of the participants in the full analysis (ITT) set who took at  
993 least 80% of study intervention and had no protocol violations that would affect the primary  
994 efficacy endpoint.
- 995 • Other Datasets that may be used for sensitivity analyses

996

## 997 9.4 STATISTICAL ANALYSES

### 998 9.4.1 GENERAL APPROACH

999

1000 Baseline demographic and clinical characteristics and other results will be summarized using descriptive  
1001 summary statistics. Data collected in the trial will be summarized overall and by treatment arm. For  
1002 continuous variables, results within each treatment arm will be summarized with the numbers of  
1003 observations, mean, standard deviation, minimum, and maximum, as well as the 95% confidence  
1004 interval for the mean. For treatment comparisons, the difference between the two treatment arms will  
1005 be summarized with the difference of the two means and 95% confidence interval for the difference of  
1006 the means. These calculations will be done under the assumption that the data for the two arms are  
1007 independent and approximately normal in distribution. If not otherwise specified, the confidence  
1008 interval for the difference of two means is calculated assuming unequal variance between the two  
1009 groups. If asymptotic assumptions fail, nonparametric summary statistics (medians, 25th and 75th  
1010 percentiles) may be displayed as an alternative. In addition, more appropriate non-parametric tests will  
1011 be considered if the assumptions for the parametric tests are violated. For the comparison of two  
1012 independent samples, if the data are not normally distributed, Wilcoxon rank-sum test will be  
1013 performed instead of the parametric t-test.

1014

1015 For categorical variables, results within each arm will be summarized with participant counts,  
1016 percentages, and 95% confidence intervals. The differences between the two treatment arms will be  
1017 summarized with the difference in percentages and the asymptotic 95% confidence interval for the  
1018 difference of two percentages.

1019

1020 Survival analysis techniques will be used to analyze the time-to-event variables. Survival curves will be  
1021 constructed using Kaplan-Meier estimates. Log-rank test results will be computed for comparison of  
1022 survival distributions. Summary tables for safety and efficacy endpoints will include event rates (Kaplan-  
1023 Meier estimates of event rates), relative risk, confidence interval for the relative risk, the difference in  
1024 means/rates, the confidence interval for difference in means/rates, and the p-value.

1025

1026

1027 For the primary efficacy endpoint, respiratory Clearance at Day 3 will be summarized by treatment  
1028 group and the difference will be tested using a two-sided Fisher's Exact Test at the 0.05 significance  
1029 level. The corresponding confidence interval for the difference in proportions will be calculated.

1030

1031 Every effort will be made to ensure the oropharyngeal samples are collected at all time points specified  
1032 by the protocol even if the subject discontinues the study drug. The primary analytic sample will be the  
1033 mITT cohort

1034

1035 All analyses will be repeated using the per-protocol population.

1036

---

#### 1037 9.4.2 ANALYSIS OF THE SECONDARY ENDPOINT(S)

1038

##### 1039 Secondary Efficacy Analysis

1040 • Fecal viral clearing at day 14 will be summarized by treatment group and the difference will  
1041 be tested separately for each day using a two-sided Fisher's Exact Test.

1042

1043 • Respiratory viral shedding as measured on days 1, 3, 7, 10, 14 will be compared between  
1044 treatment groups using repeated measures analysis.

1045

1046 • Fecal viral shedding as measured on days 1, 3, 7, 10, 14 and 21 will be compared between  
1047 treatment groups using repeated measures analysis.

1048

1049 We plan to consider additional analysis approaches including but not limited to: time to negative COVID-  
1050 19 test as determined by PCR using oropharyngeal and/or fecal samples; longitudinal analysis of  
1051 continuous measures such as body temperature and O2 saturation; The proportion of participants in  
1052 each treatment group who progress to severe COVID disease will be compared using a two-sided z test  
1053 with continuity correction. The corresponding confidence interval for the difference in proportions will  
1054 be calculated.

1055

1056 All secondary endpoint analyses will be performed for the mITT and PP populations at the 0.05  
1057 significance level. No adjustment for multiple testing will be performed.

1058

---

#### 1059 9.4.3 SAFETY ANALYSES

1060

1061 Adverse event data will be summarized for all participants in the safety population. Site-reported serious  
1062 adverse events and unexpected adverse drug reactions will be summarized as participant-based counts  
1063 and percentages by AE category.

1064

1065 In addition, participant listings will be provided for serious, unexpected, and unanticipated adverse  
1066 reactions. Any adverse events leading to discontinuation of study drug or death will also be listed for all  
1067 participants.

1068

---

#### 1069 9.4.4 BASELINE DESCRIPTIVE STATISTICS

1070

1071 Demographic characteristics and medical history, adverse events, COVID disease signs and symptoms  
1072 and treatment compliance will be summarized and compared between treatment groups. The details of  
1073 the statistical analyses will be included in the **Statistical Analysis Plan**.

1074

---

1075 9.4.5 PLANNED INTERIM ANALYSES

1076

1077 N/A

1078

---

1079 9.4.6 SUB-GROUP ANALYSES

1080 N/A

---

1081 9.4.7 TABULATION OF INDIVIDUAL PARTICIPANT DATA

1082

1083 N/A

1084

---

1085 9.4.8 EXPLORATORY ANALYSES

1086

1087 A detailed description of all statistical analyses will be presented in the ***Statistical Analysis Plan***.

1088

---

1089 **10 SUPPORTING DOCUMENTATION AND OPERATIONAL CONSIDERATIONS**

1090 **10.1 REGULATORY, ETHICAL, AND STUDY OVERSIGHT CONSIDERATIONS.**

---

1091 **10.1.1 INFORMED CONSENT PROCESS**

1092

---

1093 **10.1.1.1 CONSENT/ASSENT AND OTHER INFORMATIONAL DOCUMENTS PROVIDED TO**  
1094 **PARTICIPANTS**

1095

1096 Consent describing in detail the study intervention, study procedures, and risks will be provided to the  
1097 participant and documentation of informed consent will be required prior to administering study  
1098 interventions. Non-English speakers will be enrolled using interpreters and IRB approved Short Forms  
1099 per the IRB's Short Form policy.

1100

---

1101 **10.1.1.2 CONSENT PROCEDURES AND DOCUMENTATION**

1102

1103 Informed consent (IC) is a process that is initiated prior to the individual's agreeing to participate in the  
1104 study and continues throughout the individual's study participation. The PI or physician co-Investigator  
1105 will explain the research study to the participant and answer any questions that may arise. Utilizing the  
1106 telehealth platform, an explanation will be provided in terms suited to the participant's comprehension  
1107 of the purposes, procedures, and potential risks of the study and of their rights as research participants.  
1108 Potential participants will have the opportunity to ask questions. The participants will have the  
1109 opportunity to discuss the study with their family or surrogates or think about it prior to agreeing to  
1110 participate. They will be informed that participation is voluntary and that they may withdraw from the  
1111 study at any time, without prejudice. The rights and welfare of the participants will be protected by  
1112 emphasizing to them that the quality of their medical care will not be adversely affected if they decline  
1113 to participate in this study.

1114

1115 FDA regulations generally require that the informed consent of a trial participant be documented by the  
1116 use of a written consent form that has been approved by the IRB and signed and dated by the subject at  
1117 the time of consent (21 CFR 50.27(a)). Considering COVID-19 infection control measures, if the  
1118 technology is available, current FDA guidance suggests that electronic methods of obtaining informed  
1119 consent should be considered as follows:

1120

- 1121 • To ensure that patients are approached in a consistent fashion, a standard process should be  
1122 used that will accomplish the following:
  - 1123 • Identification of who is on the call or telemedicine visit
  - 1124 • Review of the IC with the patient by the investigator (or their designee) and response to  
1125 any questions the patient may have
  - 1126 • Confirmation by the witness that the patient's questions have been answered
  - 1127 • Confirmation by the investigator that the patient is willing to participate in the trial and  
1128 sign the informed consent document while the witness is listening on the phone
  - 1129 • Verbal confirmation by the patient that they would like to participate in the trial and  
1130 that they have signed and dated the informed consent document that is in their  
1131 possession.

1132

- 1133 • If the signed informed consent document cannot be collected from the patient's location and  
1134 included in the study records, FDA considers the following option acceptable to provide  
1135 documentation that the patient signed the informed consent document:
  - 1136 • A dated attestation by the witness who participated in the call and by the investigator  
1137 that the patient confirmed that they agreed to participate in the study and signed the  
1138 informed consent.

1139

1140 For this study involving participants with COVID-19 positivity, in accordance with FDA guidance, the  
1141 following steps will be performed while obtaining the IC by phone or telehealth video chat from the  
1142 Subject.

1143

- 1144 1) Purpose of the study and the potential risks/benefits of the use of the Investigational Agent  
1145 Niclosamide in the treatment of confirmed COVID-19 infection will be discussed in detail by the  
1146 principal investigator or sub-investigator (PI/Sub-I) with the subject prior to obtaining the IC.  
1147 Opportunity to review the ICF (informed consent form) prior to or during the discussion will be  
1148 provided. Adequate time for discussion between the PI/Sub-I will be given to the potential  
1149 participant. After review of the IC, any questions that the potential participant has will be  
1150 addressed during or after review of the IC.
- 1151
- 1152 2) Availability and/or possibility of other potential treatment options will be discussed with the  
1153 participant.

1154

- 1155 3) A second member of the study team will be present on the phone or video chat during the entire  
1156 discussion. The witness will ask the potential participant if they understand the contents of the  
1157 discussion and if they have any questions to address. The participant will be informed that they can  
1158 ask questions at any time during the trial.  
1159
- 1160 4) The PI/Sub-I will sign the ICF along with the witness. Copies of the signed form will be placed in the  
1161 patient's medical record and provided to the participant.  
1162
- 1163 5) This document will be placed into the electronic medical record and electronically signed, and time  
1164 stamped by the investigator. In **de-identified form**, it will be the study source document for  
1165 documenting the process of obtaining ICF. A copy of the electronically signed consent (signed by  
1166 the witness and investigator) is either emailed, sent by US Mail to subject.

---

1167 **10.1.2 STUDY DISCONTINUATION AND CLOSURE**

1168  
1169 This study may be temporarily suspended or prematurely terminated if there is sufficient reasonable  
1170 cause. Written notification, documenting the reason for study suspension or termination, will be  
1171 provided by the suspending or terminating party to study participants, investigator, funding agency, and  
1172 regulatory authorities. If the study is prematurely terminated or suspended, the Principal Investigator  
1173 (PI) will promptly inform study participants and the Institutional Review Board (IRB) for the termination  
1174 or suspension. Study participants will be contacted, as applicable, and be informed of changes to study  
1175 visit schedule.

1176  
1177 Circumstances that may warrant termination or suspension include, but are not limited to:

- 1178 • Determination of unexpected, significant, or unacceptable risk to participants
  - 1179 • Insufficient compliance to protocol requirements
  - 1180 • Data that are not sufficiently complete and/or evaluable
  - 1181 • Determination that the primary endpoint has been met
- 1182

1183 The study may resume once concerns about safety, protocol compliance, and data quality are addressed  
1184 and the IRB.  
1185

---

1186 **10.1.3 CONFIDENTIALITY AND PRIVACY**

1187  
1188 Participant confidentiality and privacy is strictly held in trust by the participating investigators, their  
1189 staff, and the sponsor(s) and their interventions. This confidentiality is extended to cover testing of  
1190 biological samples in addition to the clinical information relating to participants. Therefore, the study  
1191 protocol, documentation, data, and all other information generated will be held in strict confidence. No  
1192 information concerning the study, or the data will be released to any unauthorized third party without  
1193 prior written approval of the sponsor.  
1194

1195 All research activities will be conducted in as private a setting as possible. The use of the telehealth  
1196 video platform will include participant instruction on using the platform in a private setting or with a  
1197 family member/ significant other via Facetime as described in the Study Intervention.

1198  
1199 Representatives of the Institutional Review Board (IRB), regulatory agencies or pharmaceutical company  
1200 supplying study product may inspect all documents and records required to be maintained by the  
1201 investigator, including but not limited to, medical and pharmacy records for the participants in this  
1202 study. The clinical study site will permit access to such records.

1203  
1204 The study participant's contact information will be securely stored at each clinical site for internal use  
1205 during the study. At the end of the study, all records will continue to be kept in a secure location for as  
1206 long a period as dictated by the reviewing IRB, Institutional policies, or sponsor requirements.

1207 The Principal Investigator will be responsible to ensure the study is conducted in accordance with the  
1208 protocol, Good Clinical Practice (GCP), applicable regulatory requirements, and that the data recorded is  
1209 valid. To achieve this objective, the study will be continuously monitored, and the study conduct  
1210 reviewed on a weekly basis by the Study Team.

1211 Monitoring will be conducted to ensure that the rights and well-being of human participants are  
1212 protected, that the reported trial data are accurate, complete, and verifiable, and that the conduct of  
1213 the trial follows the currently approved protocol/amendment(s), with GCP, and with applicable  
1214 regulatory requirement(s).

1215 A Clinical Monitoring Plan will be created by the Study Team and will describe in detail the personnel  
1216 who will conduct the monitoring, at what frequency monitoring will be done, at what level of detail  
1217 monitoring will be performed, and the distribution of monitoring reports.

1218

---

1219 **10.1.4 FUTURE USE OF DATA**

1220 The collection of personal patient information will be limited to the amount necessary to achieve the  
1221 aims of the research, so that no unneeded sensitive information is being collected.

1222 Data from the EDC will be exported into Excel or SAS file format (password protected), which will then  
1223 be used for data analysis. Only de-identified, not including the participant's contact or identifying  
1224 information data will be used for data analysis.

1225

---

1226 **10.1.5 KEY ROLES AND STUDY GOVERNANCE**

1227 *Provide the name and contact information of the Principal Investigator.*

|                               |
|-------------------------------|
| <b>Principal Investigator</b> |
|-------------------------------|

|                  |
|------------------|
| Harry Selker, MD |
|------------------|

|                                                                                                                                                                    |
|--------------------------------------------------------------------------------------------------------------------------------------------------------------------|
| Institute for Clinical Research and Health Policy Studies<br>Tufts Clinical and Translational Science Institute (CTSI)<br>Tufts University<br>Tufts Medical Center |
| 800 Washington Street, # 63, Boston, MA 02111                                                                                                                      |
| Phone: (617) 636-5009<br>Fax: (617) 636-8023                                                                                                                       |
| Email                                                                                                                                                              |

1228  
1229

1230 **10.1.6 SAFETY OVERSIGHT**

1231 An appropriately credentialed Independent Safety Monitor (ISM) without association to the trial or  
1232 conflicts of related to the study will monitor the data on a weekly basis and make recommendations to  
1233 the PI with respect to the:

- 1234 • Safety of the trial participants including adverse events (AEs), serious adverse events (SAE's),  
1235 and unexpected problems
- 1236 • The Independent Safety Monitor will review and evaluate all AEs and SAEs in a blinded fashion,  
1237 however, can be unblinded as needed.
- 1238 • The ISM will have access to unblinded SAE rates for participants randomized to niclosamide and  
1239 placebo. Rates of non-serious AEs will also be compared between the two study groups.

1240 Subjects will be monitored for adverse events (AEs) and serious adverse events (SAEs). A greater than 3x  
1241 incidence of treatment related SAEs in the niclosamide treatment group vs placebo will be added to the  
1242 protocol as the stopping threshold

1243  
1244 The PI is personally responsible for conducting and supervising the conduct of human subject's research  
1245 by protecting the rights, safety, and welfare of subjects under the investigator's care. The PI also must  
1246 ensure that all the research conducted is done so in an ethical manner and in accordance with all  
1247 federal, state, and local laws and regulations, institutional policies/procedures, the study protocol/plan,  
1248 and the requirements of the IRB. Oversight is defined as management by overseeing the performance or  
1249 operation of a person or group, watchful care, superintendence, general supervision. Any person serving  
1250 as a PI has voluntarily accepted these responsibilities and is expected to fully comply with these  
1251 requirements. To provide PI oversight and to ensure that the rights, safety, and welfare of research  
1252 subjects is protected the PI will, at a minimum, confirm:

- 1253 • Any individual to whom a task is delegated is qualified by education, training, and experience to  
1254 perform the task.
- 1255 • There is adequate training for all staff participating in the conduct of the study
- 1256 • The PI or another qualified individual associated with the study is available to study subjects to  
1257 answer questions or provide care during the conduct of the research
- 1258 • All research staff adhere to the research plan (i.e., inclusion/exclusion criteria, safety  
1259 assessments, safety monitoring and reporting of unanticipated problems).

1260  
1261

**Expected Oversight Practices**

- 1262
- 1263
- 1264
- 1265
- 1266
- 1267
- 1268
- 1269
- 1270
- 1271
- 1272
- 1273
- 1274
- 1275
- 1276
- 1277
- 1278
- 1279
- 1280
- 1281
- 1282
- 1283
- 1284
- 1285
- 1286
- 1287
- 1288
- 1289
- 1290
- 1291
- 1292
- 1293
- 1294
- The PI will work closely with the study team to ensure oversight of the research study and the necessary documentation of such activities. A sub- Investigator can cover for the PI when he is unavailable or is on vacation.
  - A Delegation of Authority Log will be completed prior to opening to accrual. This log will be maintained accurately during the life of the study.
  - A Training Log will be completed prior to opening to accrual. This log will be maintained accurately during the life of the study.
  - The PI or delegated physician Investigator will sign-off on all study-related documents (i.e., eligibility verification) prior to subjects beginning study treatment per protocol to ensure the safety of the study participants
  - The PI or delegated physician Investigator will evaluate and ascribe attribution, sign-off on all AEs and SAEs.
  - The PI and Study Team will establish the method in which they will consistently communicate. At a minimum, this is intended to be through a combination of electronic, audio, and face to face interactions. Details and specifics of these interactions will be established by the PI and Study Team prior to activation of each study.
  - Communication regarding SAEs will be documented in real-time. If the PI is not available, the delegated physician Investigator should be notified.
  - Regular meetings with the PI to discuss subject participation, including AEs and treatment, will be established to ensure adequate oversight. This is in addition to the immediate availability of the PI, or delegated physician Investigator, to address SAE, protocol interpretation, safety monitoring or other urgent clinical needs. Involvement of the treating sub-investigator is recommended but not required.
  - Timely and accurate documentation of oversight is required and will be provided by the PI consistent with FDA1572. The nature of oversight documentation is through written and electronic means.
  - The PI or physician Investigator will complete urgent documents including initial SAE review and sign-off within 24 hours of notification of the event.
  - All non-urgent regulatory documents including IRB submission/revisions, AE attribution assignments, AE grading will be completed by the PI or physician Investigator within 48 hours.
  - Additional study documents including but not limited to research notes, email correspondences, and study logs are to be reviewed at least on a weekly basis by the PI and included with research documentation.

---

### 10.1.7 CLINICAL MONITORING

1297

1298

1299

1300

1301

Clinical monitoring will be conducted to ensure that the rights and well-being of trial participants are protected, that the reported trial data are accurate, complete, and verifiable, and that the conduct of the trial is in compliance with the currently approved protocol/amendment(s), with International



1302 Conference on Harmonisation Good Clinical Practice (ICH GCP), and with applicable regulatory  
1303 requirement(s).

1304

1305 *Refer to **Section 10.1.6 Safety Oversight for details.***

1306

---

1307 **10.1.8 QUALITY ASSURANCE AND QUALITY CONTROL**

1308

1309 Quality control (QC) procedures will be implemented beginning with the data entry system and data QC  
1310 checks that will be run on the database will be generated. Any missing data or data anomalies will be  
1311 communicated to study PI or designee for resolution.

1312

1313 Following written Standard Operating Procedures (SOPs), the PI and co- Investigators will verify that the  
1314 clinical trial is conducted, and data are generated, and biological specimens are collected, documented  
1315 (recorded), and reported in compliance with the protocol, International Conference on Harmonisation  
1316 Good Clinical Practice (ICH GCP), and applicable regulatory requirements (e.g., Good Laboratory  
1317 Practices (GLP), Good Manufacturing Practices (GMP)).

1318

1319 The investigational site will provide direct access to all source data/documents, and reports for the  
1320 purpose of monitoring, auditing and inspection by local and regulatory authorities.

1321

---

1322 **10.1.9 DATA HANDLING AND RECORD KEEPING.**

1323

---

1324 **10.1.9.1 DATA COLLECTION AND MANAGEMENT RESPONSIBILITIES**

1325

1326 Data collection is the responsibility of the Study Staff under the supervision of the Investigator. The  
1327 Investigator is responsible for ensuring the accuracy, completeness, legibility, and timeliness of the data  
1328 reported.

1329

1330 All source documents will be completed in a neat, legible manner to ensure accurate interpretation of  
1331 data.

1332

1333 Any hardcopies of study visit worksheets will be provided for use as source document worksheets for  
1334 recording data for each participant enrolled in the study. Data recorded in the electronic case report  
1335 form (eCRF) derived from study source documents will be consistent with the data recorded on the  
1336 source documents.

1337

1338 Clinical data, AEs, concomitant medications, and any other data collected from participants will be  
1339 entered into a REDCap database. The data system includes password protection and internal quality  
1340 checks, such as automatic range checks, to identify data that appear inconsistent, incomplete, or  
1341 inaccurate. Clinical data will be entered directly from the source documents.

1342

---

1343 **10.1.9.2 STUDY RECORDS RETENTION**

1344

1345 We will follow the IRB's *HRP-073 - SOP - Records Retention Timeframe – Investigators (0.03)*

1346

---

1347 10.1.10 PROTOCOL DEVIATIONS

1348

1349 A protocol deviation is any noncompliance with the clinical trial protocol, International Conference on  
1350 Harmonisation Good Clinical Practice (ICH GCP), or Manual of Procedures (MOP) requirements. The  
1351 noncompliance may be either on the part of the participant, the Investigator, or the Study Team. As a  
1352 result of deviations, corrective actions are to be developed by the site and implemented promptly.

1353

1354 These practices are consistent with ICH GCP:

- 1355 • 4.5 Compliance with Protocol, sections 4.5.1, 4.5.2, and 4.5.3
- 1356 • 5.1 Quality Assurance and Quality Control, section 5.1.1
- 1357 • 5.20 Noncompliance, sections 5.20.1, and 5.20.2.

1358 Protocol deviations will be summarized by type of deviation and treatment group. Protocol deviation  
1359 summaries will be participant-based.

1360

---

1361 10.1.11 PUBLICATION AND DATA SHARING POLICY

1362 The preparation and submittal for publication of manuscripts containing the study results shall be in  
1363 accordance with a process determined by mutual written agreement among the study Sponsor and  
1364 participating institutions. The publication or presentation of any study results shall comply with all  
1365 applicable privacy laws, including, but not limited to, the Health Insurance Portability and Accountability  
1366 Act of 1996.

1367 This study will comply with the NIH Data Sharing Policy and Policy on the Dissemination of NIH-Funded  
1368 Clinical Trial Information and the Clinical Trials Registration and Results Information Submission rule. As  
1369 such, this trial will be registered at ClinicalTrials.gov, and results information from this trial will be  
1370 submitted to ClinicalTrials.gov. In addition, every attempt will be made to publish results in peer-  
1371 reviewed journals.

1372

---

1373 10.1.12 CONFLICT OF INTEREST POLICY

1374

1375 The independence of this study from any actual or perceived influence, such as by the pharmaceutical  
1376 industry, is critical. Therefore, any actual conflict of interest of persons who have a role in the design,  
1377 conduct, analysis, publication, or any aspect of this trial will be disclosed and managed. Furthermore,  
1378 persons who have a perceived conflict of interest will be required to have such conflicts managed in a  
1379 way that is appropriate to their participation in the design and conduct of this trial. The study  
1380 leadership in conjunction has established policies and procedures for all study group members to  
1381 disclose all conflicts of interest and will establish a mechanism for the management of all reported  
1382 dualities of interest.

1383

1384 10.2 ADDITIONAL CONSIDERATIONS

1385

1386

1387

10.3 ABBREVIATIONS

1388

|         |                                                     |
|---------|-----------------------------------------------------|
| AE      | Adverse Event                                       |
| ANCOVA  | Analysis of Covariance                              |
| CFR     | Code of Federal Regulations                         |
| CLIA    | Clinical Laboratory Improvement Amendments          |
| CMP     | Clinical Monitoring Plan                            |
| COC     | Certificate of Confidentiality                      |
| CONSORT | Consolidated Standards of Reporting Trials          |
| CRF     | Case Report Form                                    |
| DCC     | Data Coordinating Center                            |
| DHHS    | Department of Health and Human Services             |
| DSMB    | Data Safety Monitoring Board                        |
| DRE     | Disease-Related Event                               |
| EC      | Ethics Committee                                    |
| eCRF    | Electronic Case Report Forms                        |
| FDA     | Food and Drug Administration                        |
| FDAAA   | Food and Drug Administration Amendments Act of 2007 |
| FFR     | Federal Financial Report                            |
| GCP     | Good Clinical Practice                              |
| GLP     | Good Laboratory Practices                           |
| GMP     | Good Manufacturing Practices                        |
| GWAS    | Genome-Wide Association Studies                     |
| HIPAA   | Health Insurance Portability and Accountability Act |
| IB      | Investigator's Brochure                             |
| ICH     | International Conference on Harmonisation           |
| ICMJE   | International Committee of Medical Journal Editors  |
| IDE     | Investigational Device Exemption                    |
| IND     | Investigational New Drug Application                |
| IRB     | Institutional Review Board                          |
| ISM     | Independent Safety Monitor                          |
| ISO     | International Organization for Standardization      |
| ITT     | Intention-To-Treat                                  |
| LSMEANS | Least-squares Means                                 |
| MedDRA  | Medical Dictionary for Regulatory Activities        |
| MOP     | Manual of Procedures                                |
| MSDS    | Material Safety Data Sheet                          |
| NCT     | National Clinical Trial                             |
| NIH     | National Institutes of Health                       |
| NIH IC  | NIH Institute or Center                             |
| OHRP    | Office for Human Research Protections               |
| PI      | Principal Investigator                              |
| QA      | Quality Assurance                                   |
| QC      | Quality Control                                     |
| SAE     | Serious Adverse Event                               |
| SAP     | Statistical Analysis Plan                           |

|     |                              |
|-----|------------------------------|
| SMC | Safety Monitoring Committee  |
| SOA | Schedule of Activities       |
| SOC | System Organ Class           |
| SOP | Standard Operating Procedure |
| UP  | Unanticipated Problem        |
| US  | United States                |

1389

1390



## 11 REFERENCES

- 1397
- 1398 1. Wu, Y., C. Guo, L. Tang, Z. Hong, J. Zhou, X. Dong, H. Yin, Q. Xiao, Y. Tang, X. Qu, L. Kuang, X.  
1399 Fang, N. Mishra, J. Lu, H. Shan, G. Jiang, and X. Huang, *Prolonged presence of SARS-CoV-2 viral*  
1400 *RNA in faecal samples*. *Lancet Gastroenterol Hepatol*, 2020. **5**(5): p. 434-435. 7158584
- 1401 2. Jeon, S., M. Ko, J. Lee, I. Choi, S.Y. Byun, S. Park, D. Shum, and S. Kim, *Identification of antiviral*  
1402 *drug candidates against SARS-CoV-2 from FDA-approved drugs*. *bioRxiv*, 2020: p.  
1403 2020.03.20.999730.
- 1404 3. Jung, E., S. Nam, H. Oh, S. Jun, H.J. Ro, B. Kim, M. Kim, and Y.Y. Go, *Neutralization of Acidic*  
1405 *Intracellular Vesicles by Niclosamide Inhibits Multiple Steps of the Dengue Virus Life Cycle In*  
1406 *Vitro*. *Sci Rep*, 2019. **9**(1): p. 8682. 6582152
- 1407 4. Cairns, D.M., D. Boorgu, M. Levin, and D.L. Kaplan, *Niclosamide rescues microcephaly in a*  
1408 *humanized in vivo model of Zika infection using human induced neural stem cells*. *Biol Open*,  
1409 2018. **7**(1). 5829514
- 1410 5. Chen, W., R.A. Mook, Jr., R.T. Premont, and J. Wang, *Niclosamide: Beyond an antihelminthic*  
1411 *drug*. *Cell Signal*, 2018. **41**: p. 89-96. 5628105
- 1412 6. Andersen, P.I., K. Krpina, A. Ianevski, N. Shtaida, E. Jo, J. Yang, S. Koit, T. Tenson, V. Hukkanen,  
1413 M.W. Anthonsen, M. Bjoras, M. Evander, M.P. Windisch, E. Zusinaite, and D.E. Kainov, *Novel*  
1414 *Antiviral Activities of Obatoclax, Emetine, Niclosamide, Brequinar, and Homoharringtonine*.  
1415 *Viruses*, 2019. **11**(10). 6832696
- 1416 7. Fan, X., J. Xu, M. Files, J.D. Cirillo, J.J. Endsley, J. Zhou, and M.A. Endsley, *Dual activity of*  
1417 *niclosamide to suppress replication of integrated HIV-1 and Mycobacterium tuberculosis*  
1418 *(Beijing)*. *Tuberculosis (Edinb)*, 2019. **116S**: p. S28-S33.
- 1419 8. Jurgeit, A., R. McDowell, S. Moese, E. Meldrum, R. Schwendener, and U.F. Greber, *Niclosamide is*  
1420 *a proton carrier and targets acidic endosomes with broad antiviral effects*. *PLoS Pathog*, 2012.  
1421 **8**(10): p. e1002976. 3486884
- 1422 9. Marrugal-Lorenzo, J.A., A. Serna-Gallego, J. Berastegui-Cabrera, J. Pachon, and J. Sanchez-  
1423 Cespedes, *Repositioning salicylanilide anthelmintic drugs to treat adenovirus infections*. *Sci Rep*,  
1424 2019. **9**(1): p. 17. 6327057
- 1425 10. Wang, Y.M., J.W. Lu, C.C. Lin, Y.F. Chin, T.Y. Wu, L.I. Lin, Z.Z. Lai, S.C. Kuo, and Y.J. Ho, *Antiviral*  
1426 *activities of niclosamide and nitazoxanide against chikungunya virus entry and transmission*.  
1427 *Antiviral Res*, 2016. **135**: p. 81-90.
- 1428 11. Xu, J., P.Y. Shi, H. Li, and J. Zhou, *Broad Spectrum Antiviral Agent Niclosamide and Its*  
1429 *Therapeutic Potential*. *ACS Infect Dis*, 2020.
- 1430 12. Xu, M., E.M. Lee, Z. Wen, Y. Cheng, W.K. Huang, X. Qian, J. Tcw, J. Kouznetsova, S.C. Ogden, C.  
1431 Hammack, F. Jacob, H.N. Nguyen, M. Itkin, C. Hanna, P. Shinn, C. Allen, S.G. Michael, A.  
1432 Simeonov, W. Huang, K.M. Christian, A. Goate, K.J. Brennand, R. Huang, M. Xia, G.L. Ming, W.  
1433 Zheng, H. Song, and H. Tang, *Identification of small-molecule inhibitors of Zika virus infection and*  
1434 *induced neural cell death via a drug repurposing screen*. *Nat Med*, 2016. **22**(10): p. 1101-1107.

- 1435 13. Wu, C.J., J.T. Jan, C.M. Chen, H.P. Hsieh, D.R. Hwang, H.W. Liu, C.Y. Liu, H.W. Huang, S.C. Chen,  
1436 C.F. Hong, R.K. Lin, Y.S. Chao, and J.T. Hsu, *Inhibition of severe acute respiratory syndrome*  
1437 *coronavirus replication by niclosamide*. *Antimicrob Agents Chemother*, 2004. **48**(7): p. 2693-6.  
1438 434198
- 1439 14. Mazzon, M., A.M. Ortega-Prieto, D. Imrie, C. Luft, L. Hess, S. Czieso, J. Grove, J.K. Skelton, L.  
1440 Farleigh, J.J. Bugert, E. Wright, N. Temperton, R. Angell, S. Oxenford, M. Jacobs, R. Ketteler, M.  
1441 Dorner, and M. Marsh, *Identification of Broad-Spectrum Antiviral Compounds by Targeting Viral*  
1442 *Entry*. *Viruses*, 2019. **11**(2). 6410080
- 1443 15. Sekulovski, N., A.E. Whorton, T. Tanaka, Y. Hirota, M. Shi, J.A. MacLean, J.R.L. Mola, K. Groesch,  
1444 P. Diaz-Sylvester, T. Wilson, and K. Hayashi, *Niclosamide suppresses macrophage induced*  
1445 *inflammation in endometriosis*. *Biol Reprod*, 2020.
- 1446 16. Thatikonda, S., V. Pooladanda, and C.A.-O.h.o.o. Godugu, *Repurposing an old drug for new use:*  
1447 *Niclosamide in psoriasis-like skin inflammation*. (1097-4652 (Electronic)).
- 1448 17. Hochmair, M., B. Rath, L. Klameth, E. Ulsperger, C. Weinlinger, A. Fazekas, A. Plangger, R.  
1449 Zeillinger, and G. Hamilton, *Effects of salinomycin and niclosamide on small cell lung cancer and*  
1450 *small cell lung cancer circulating tumor cell lines*. *Invest New Drugs*, 2019.
- 1451 18. Chai, W.H., Y.R. Li, S.H. Lin, Y.H. Chao, C.H. Chen, P.C. Chan, and C.H. Lin, *Antihelminthic*  
1452 *Niclosamide Induces Autophagy and Delayed Apoptosis in Human Non-small Lung Cancer Cells In*  
1453 *Vitro and In Vivo*. *Anticancer Res*, 2020. **40**(3): p. 1405-1417.
- 1454 19. Boyapally, R., G. Pulivendala, S. Bale, and C. Godugu, *Niclosamide alleviates pulmonary fibrosis*  
1455 *in vitro and in vivo by attenuation of epithelial-to-mesenchymal transition, matrix proteins &*  
1456 *Wnt/beta-catenin signaling: A drug repurposing study*. *Life Sci*, 2019. **220**: p. 8-20.
- 1457 20. Cabrita, I., R. Benedetto, R. Schreiber, and K. Kunzelmann, *Niclosamide repurposed for the*  
1458 *treatment of inflammatory airway disease*. *JCI Insight*, 2019. **4**(15). 6693830
- 1459 21. Miner, K., K. Labitzke, B. Liu, P. Wang, K. Henckels, K. Gaida, R. Elliott, J.J. Chen, L. Liu, A. Leith, E.  
1460 Trueblood, K. Hensley, X.Z. Xia, O. Homann, B. Bennett, M. Fiorino, J. Whoriskey, G. Yu, S.  
1461 Escobar, M. Wong, T.L. Born, A. Budelsky, M. Comeau, D. Smith, J. Phillips, J.A. Johnston, J.G.  
1462 McGivern, K. Weikl, D. Powers, K. Kunzelmann, D. Mohn, A. Hochheimer, and J.K. Sullivan, *Drug*  
1463 *Repurposing: The Anthelmintics Niclosamide and Nitazoxanide Are Potent TMEM16A*  
1464 *Antagonists That Fully Bronchodilate Airways*. (1663-9812 (Print)).
- 1465 22. Burock, S., S. Daum, U. Keilholz, K. Neumann, W. Walther, and U. Stein, *Phase II trial to*  
1466 *investigate the safety and efficacy of orally applied niclosamide in patients with metachronous*  
1467 *or synchronous metastases of a colorectal cancer progressing after therapy: the NIKOLO trial*.  
1468 *BMC Cancer*, 2018. **18**(1): p. 297. 5856000
- 1469 23. Burock, S., S. Daum, H. TrVdger, T.D. Kim, S. KrVdger, D.T. Rieke, S. Ochsenreither, K. Welter, P.  
1470 Herrmann, A. Slegers, W. Walther, U. Keilholz, and U. Stein, *Niclosamide a new chemotherapy*  
1471 *agent? Pharmacokinetics of the potential anticancer drug in a patient cohort of the NIKOLO trial*.  
1472 *Journal of Clinical Oncology*, 2018. **36**(15\_suppl): p. e14536-e14536.
- 1473 24. *A Study of Niclosamide Enemas in Subjects With Active Ulcerative Proctitis or Ulcerative*  
1474 *Proctosigmoiditis*. 2018: Clinicaltrials.gov.



- 1475 25. Guan, W.J., Z.Y. Ni, Y. Hu, W.H. Liang, C.Q. Ou, J.X. He, L. Liu, H. Shan, C.L. Lei, D.S.C. Hui, B. Du,  
1476 L.J. Li, G. Zeng, K.Y. Yuen, R.C. Chen, C.L. Tang, T. Wang, P.Y. Chen, J. Xiang, S.Y. Li, J.L. Wang, Z.J.  
1477 Liang, Y.X. Peng, L. Wei, Y. Liu, Y.H. Hu, P. Peng, J.M. Wang, J.Y. Liu, Z. Chen, G. Li, Z.J. Zheng, S.Q.  
1478 Qiu, J. Luo, C.J. Ye, S.Y. Zhu, and N.S. Zhong, *Clinical Characteristics of Coronavirus Disease 2019*  
1479 *in China*. N Engl J Med, 2020. 7092819
- 1480 26. *Preliminary Estimates of the Prevalence of Selected Underlying Health Conditions Among*  
1481 *Patients with Coronavirus Disease 2019 — United States, February 12–March 28, 2020*. . MMWR  
1482 Morb Mortal Wkly Rep, (69): p. 382-386.
- 1483 27. Survey, N.H.I., *Early release of selected estimates based on data from the 2018 National Health*  
1484 *Interview Survey*. US Department of Health and Human Services, CDC, 2020.
- 1485 28. Jin, X., J.S. Lian, J.H. Hu, J. Gao, L. Zheng, Y.M. Zhang, S.R. Hao, H.Y. Jia, H. Cai, X.L. Zhang, G.D.  
1486 Yu, K.J. Xu, X.Y. Wang, J.Q. Gu, S.Y. Zhang, C.Y. Ye, C.L. Jin, Y.F. Lu, X. Yu, X.P. Yu, J.R. Huang, K.L.  
1487 Xu, Q. Ni, C.B. Yu, B. Zhu, Y.T. Li, J. Liu, H. Zhao, X. Zhang, L. Yu, Y.Z. Guo, J.W. Su, J.J. Tao, G.J.  
1488 Lang, X.X. Wu, W.R. Wu, T.T. Qv, D.R. Xiang, P. Yi, D. Shi, Y. Chen, Y. Ren, Y.Q. Qiu, L.J. Li, J.  
1489 Sheng, and Y. Yang, *Epidemiological, clinical and virological characteristics of 74 cases of*  
1490 *coronavirus-infected disease 2019 (COVID-19) with gastrointestinal symptoms*. Gut, 2020.  
1491 7133387
- 1492 29. Hamming, I., W. Timens, M.L. Bulthuis, A.T. Lely, G. Navis, and H. van Goor, *Tissue distribution of*  
1493 *ACE2 protein, the functional receptor for SARS coronavirus. A first step in understanding SARS*  
1494 *pathogenesis*. J Pathol, 2004. **203**(2): p. 631-7. 7167720
- 1495 30. Chang, Y.-W., T.-K. Yeh, K.-T. Lin, W.-C. Chen, H.-T. Yao, S.-J. Lan, Y.-S. Wu, H.-P. Hsieh, C.-M.  
1496 Chen, and C.-T. Chen, *Pharmacokinetics of Anti-SARS-CoV Agent Niclosamide and Its Analogs in*  
1497 *Rats*. Journal of Food and Drug Analysis, 2006. **14**.
- 1498 31. Zhang, J.L., H.F. Si, X.F. Shang, X.K. Zhang, B. Li, X.Z. Zhou, and J.Y. Zhang, *New life for an old*  
1499 *drug: In vitro and in vivo effects of the anthelmintic drug niclosamide against Toxoplasma gondii*  
1500 *RH strain*. Int J Parasitol Drugs Drug Resist, 2019. **9**: p. 27-34. 6312869
- 1501 32. Domalaon, R., P.M. De Silva, A. Kumar, G.G. Zhanel, and F. Schweizer, *The Anthelmintic Drug*  
1502 *Niclosamide Synergizes with Colistin and Reverses Colistin Resistance in Gram-Negative Bacilli*.  
1503 Antimicrob Agents Chemother, 2019. **63**(4). 6437516
- 1504 33. Tam, J., T. Hamza, B. Ma, K. Chen, G.L. Beilhartz, J. Ravel, H. Feng, and R.A. Melnyk, *Host-*  
1505 *targeted niclosamide inhibits C. difficile virulence and prevents disease in mice without*  
1506 *disrupting the gut microbiota*. Nat Commun, 2018. **9**(1): p. 5233. 6286312
- 1507 34. Farkouh, M.E., M. Domanski, G.D. Dargas, L.C. Godoy, M.J. Mack, F.S. Siami, T.H. Hamza, B.  
1508 Shah, G.G. Stefanini, M.S. Sidhu, J.F. Tanguay, K. Ramanathan, S.K. Sharma, J. French, W. Hueb,  
1509 D.J. Cohen, and V. Fuster, *Long-Term Survival Following Multivessel Revascularization in Patients*  
1510 *With Diabetes: The FREEDOM Follow-On Study*. J Am Coll Cardiol, 2019. **73**(6): p. 629-638.  
1511 6839829
- 1512 35. Hatamipour, M., M.R. Jaafari, A.A. Momtazi-Borojeni, M. Ramezani, and A. Sahebkar,  
1513 *Development, characterization and evaluation of in vivo anti-tumor activity of niclosamide*  
1514 *nanoliposomes against colon carcinoma*. Curr Mol Pharmacol, 2019.

- 1515 36. Hatamipour, M., M.R. Jaafari, A.A. Momtazi-Borojeni, M. Ramezani, and A. Sahebkar,  
1516 *Nanoliposomal Encapsulation Enhances In Vivo Anti-Tumor Activity of Niclosamide against*  
1517 *Melanoma*. *Anticancer Agents Med Chem*, 2019. **19**(13): p. 1618-1626.
- 1518 37. Huang C, wang Y, Li X, et al. (2020) Clinical features of patients infected with 2019 novel  
1519 coronavirus in Wuhan, China. *Lancet* 395: 497-506.
- 1520 38. Ding S, Lian TJ. (2020) Is SARS-CoV-2 Also an Enteric Pathogen With Potential Fecal– Oral  
1521 Transmission? A COVID-19 Virological and Clinical Review. *Gastroenterology*. 5: 1-9.
- 1522 39. Lescure, Francois-Xavier et al. (2020) Clinical and virological data of the first cases of COVID-19  
1523 in Europe: a case series. *The Lancet Infectious Diseases*. 20(6):697 – 706.
- 1524 40. Luo, F., Luo, M., Rong, Q. et al. Niclosamide, an antihelmintic drug, enhances efficacy of PD-  
1525 1/PD-L1 immune checkpoint blockade in non-small cell lung cancer. *j. immunotherapy cancer* 7,  
1526 245 (2019). <https://doi.org/10.1186/s40425-019-0733-7>.
- 1527 41. Azzi L, Carcano G, Dalla Gasperina D, Sessa F, Maurino V, Baj A. Two cases of COVID-19 with  
1528 positive salivary and negative pharyngeal or respiratory swabs at hospital discharge: A rising  
1529 concern [published online ahead of print, 2020 Apr 25]. *Oral Dis*. 2020;10.1111/odi.13368.  
1530 doi:10.1111/odi.13368
- 1531 42. Wyllie, A.L., Fournier, J., Casanovas-Massana, A., Campbell, M., Tokuyama, M., Vijayakumar, P.,  
1532 Geng, B., Muenker, M.C., Moore, A.J., Vogels, C.B. and Petrone, M.E., 2020. Saliva is more  
1533 sensitive for SARS-CoV-2 detection in COVID-19 patients than nasopharyngeal swabs. *Medrxiv*.  
1534
- 1535
- 1536

1 Statistical analysis plan -- Niclosamide for Patients with Mild to Moderate Disease  
2 from Novel Coronavirus (COVID-19)

3 Clinicaltrials.gov NCT04399356

4 SAP version 1, July 13, 2021, based on protocol version 8.0, February 2021

5 **SAP contributors**

6 Ludovic Trinquart

7 Lori Lyn Price

8 **Background and rationale**

9

10 Therapeutic approaches are needed to improve outcomes in patients with COVID-19. Niclosamide is an  
11 oral anthelmintic drug primarily used to treat parasitic infections. However niclosamide may have  
12 broad clinical applications to treat diseases other than those caused by parasites. Niclosamide has  
13 potent antiviral activity against single-stranded RNA viruses including coronaviruses. It was proposed as  
14 an antiviral during the SARS outbreak in 2002. It was found to inhibit SARS coronavirus, SARS-CoV, in *in*  
15 *vitro* studies and similarly structured RNA viruses (both *in vitro* and *in vivo*). Niclosamide has antiviral  
16 properties for similarly structured pathogenic viruses, including Zika virus, adenovirus, dengue, and  
17 chikungunya virus.

18 Because the drug is inexpensive and has few if any side effects, taking Niclosamide prophylactically  
19 might help to prevent COVID-19 spreading. Even if this treatment does not completely eradicate  
20 infection, niclosamide treatment may help to decrease viral load, thereby allowing the host immune  
21 system to better combat the disease.

22 **Objectives**

23

24 Primary Objective: To evaluate the efficacy of niclosamide in shortening contagious period as  
25 determined by time to viral clearance.

26 Secondary Objectives: To evaluate the efficacy of niclosamide on symptoms and progression to severe  
27 COVID-19.

28 **Study Methods**

29 *Trial design*

30 The trial is a single-center, randomized, parallel-group, placebo-controlled trial. Treatment allocation  
31 was a 1:1 ratio. Patients were randomized to either niclosamide (2 grams orally once daily for 7 days) or  
32 matched placebo control.

33 *Randomization*

34 The random allocation sequence was computer-generated by a biostatistician. Randomization was  
35 stratified into three strata: Tufts lab and non-Tufts lab. We used blocking (block size 4). The random  
36 allocation sequence was implemented into the Redcap Electronic Data Capture (EDC) system which  
37 guaranteed concealment of the sequence until treatments were assigned.

38 *Sample size*

39 For the primary efficacy endpoint of respiratory virologic clearance at Day 3 measured by oropharyngeal  
40 viral shedding, 40 participants in each group achieve 89.1% power to detect a difference between the  
41 group proportions of 35%. We assumed that 50% and 15% of participants in the niclosamide and  
42 placebo groups would have a negative test on Day 3. The calculation was under a two-sided Fisher's  
43 Exact Test and a significance level of 0.05.

44 *Framework*

45 For all objectives, we test for superiority of niclosamide against placebo.

46 *Statistical interim analyses and stopping guidance*

47 We did not plan or perform any interim analyses.

48 The trial was closed to recruitment on June 22, 2021 due to the effective ending of the COVID-19  
49 epidemic in Massachusetts resulting in lack of available candidates.

50 *Timing of final analysis*  
51 Final analysis will take place in one stage, when every patient has reached 30-day follow-up and data for  
52 the primary and secondary endpoints have been received and cleaned.

53 *Timing of outcome assessments, including visit windows*  
54 Primary efficacy endpoint: respiratory viral clearance at Day 3.

55 Secondary efficacy endpoints

- 56 • Fecal viral clearance at Day 14.
- 57 • Reduction in viral shedding as measured by oropharyngeal swab on days, 3, 7, 10, 14.
- 58 • Reduction in fecal viral shedding as measured by fecal PCR on days, 3, 7, 10, 14 and 21.
- 59 • Progression to severe COVID.
- 60 • Resolution of symptoms (including but not limited to fever, cough, fatigue).

## 61 **Statistical principles**

62 *Confidence intervals and P values*

63 All statistical tests will be 2-sided and will be performed using a 5% significance level. We will derive 95%  
64 two-sided confidence intervals.

65 *Adherence and protocol deviations*

66 In this study, four pills are to be taken daily for 7 days. Compliance is assessed by the percentage of  
67 subjects who have taken the scheduled number of pills:

68 % compliance = 100x (number of pills taken / 28 pills supposed to have been taken).

69 We will summarize compliance by randomization group: mean % compliance as well as number and  
70 percentage of participants with more than 80% compliance (24 pills out of 28).

71 Similarly, we will assess compliance with oropharyngeal and fecal sampling.

72 Protocol deviations will be classified into:

- 73 • PCR > 3 days before randomization
- 74 • taking the first dose before the first telehealth visit
- 75 • missing at least 1 telehealth visit
- 76 • collecting at least one oropharyngeal sample outside of window (day 1, 3, 7, 10, 14 ±1 day)
- 77 • collecting at least one fecal sample outside of window (day, 1, 3, 7, 10, 14, 21 ±1 day)
- 78 • collecting less than 5 oropharyngeal samples
- 79 • collecting less than 6 fecal samples
- 80 • taking the wrong dose at least once
- 81 • taking the wrong dose at least once
- 82 • missing a dose at least once
- 83 • expected assessments not completed during at least one telehealth visit (e.g., physician disconnected)

84 Protocol deviations were classified prior to unblinding of treatment assignment. We will report detailed  
85 protocol deviations per participant. We will summarize the number and percentage of participants with  
86 protocol deviations by treatment group with details of type of deviation.

87 *Analysis populations*

88 We will exclude participants who withdrew consent after randomization but before taking any sample or  
89 pill.

90 The intention-to-treat (ITT) population will include all randomized patients according to the treatment  
91 they were randomized to receive.

92 The per-protocol population will a subset of the participants in the full analysis (ITT) set who took at  
93 least 80% of study intervention.

94 The modified ITT population will include participants who took at least one pill, have a positive  
95 oropharyngeal test result on Day 1 and have Day 3 oropharyngeal sample results available for analysis.

96 The safety population will include participants who took at least one pill.

## 97 **Trial population**

### 98 *Screening, eligibility, recruitment, and withdrawal/follow-up*

99 We will use a CONSORT flow diagram to summarize the number of participants who were:

- 100 • assessed for eligibility at screening
- 101 • eligible at screening
- 102 • eligible and randomized
- 103 • withdrew prior to received first dose
- 104 • randomized and included in the primary analysis

105 The flow diagram will also show the numbers who were eligible but not randomized, who did not  
106 receive the randomized allocation, who were lost to follow-up, who discontinued the intervention, and  
107 we will describe the reasons.

### 108 *Baseline patient characteristics*

109 Participants will be described at the time of randomization with respect to age, sex, race/ethnicity,  
110 COVID-19 symptoms, smoking, obesity/overweight, asthma, COPD, cancer, cerebrovascular disease,  
111 CKD, cystic fibrosis, heart conditions, hypertension, immunocompromised state, liver disease, neurologic  
112 conditions, pulmonary fibrosis, sickle cell disease, thalassemia, diabetes, both overall and separately for  
113 the two randomization groups. We will summarize categorical data by numbers and percentages. We  
114 will summarize continuous data by mean, SD (or median, Q1-Q3 if data are skewed). We will not  
115 undertake tests of statistical significance. We will note the clinical importance of any imbalance.

## 116 **Analysis**

### 117 *Outcome definitions*

#### 118 Viral clearance

119 Respiratory viral clearance is defined as the first day a participant’s oropharyngeal sample result is  
120 negative, provided that none of the subsequent oropharyngeal sample results are positive. In primary  
121 analyses, we will use sample results (positive or negative) as returned by Diagnostic Solutions  
122 Laboratory. We will use a similar definition for fecal viral clearance. We will calculate the time to  
123 clearance since Day 1.

124 If a participant has several samples on the same day, we will consider the result to be positive if at least  
125 one of the sample results is positive, and negative otherwise.

126 In table 1, we illustrate possible patterns of time to viral clearance and time post-viral clearance. We  
127 illustrate samples available on days per protocol. But, according to our definition of clearance, time to  
128 clearance and time post-clearance are identifiable even if samples taken on different days.

129 *Table 1: Patterns of sample results and time to viral clearance*

| Day 1 | Day 3 | Day 7 | Day 10 | Day 14 | Clearance vs. censored | Time to clearance | Time post-clearance |
|-------|-------|-------|--------|--------|------------------------|-------------------|---------------------|
|       |       |       |        |        |                        |                   |                     |

|   |   |   |   |   |   |    |    |
|---|---|---|---|---|---|----|----|
| + | + | + | - | - | 1 | 10 | 4  |
| - | - | - | - | - | 1 | 1  | 13 |
| - | + | - | + | + | 0 | 14 | 0  |
| - | + | - | - | - | 1 | 7  | 7  |

130

131 In absence of deviations from protocol, we expect oropharyngeal sample results on 5 distinct days (day  
 132 1, 3, 7, 10, 14) and fecal sample on 6 distinct days (day 1, 3, 7, 10, 14, 21). Some participants may have  
 133 samples on less than 5 or 6 distinct days. We will identify the occurrence of viral clearance as defined  
 134 above based on available samples. If clearance is not observed, we will censor participants at their last  
 135 available sample. In Table 2, we illustrate possible patterns of non-available sample results.

136 *Table 2: Patterns of days without sample result available and time to viral clearance*

| Day 1 | Day 3 | Day 7 | Day 10 | Day 14 | Clearance vs. censored | Time to clearance | Time post-clearance |
|-------|-------|-------|--------|--------|------------------------|-------------------|---------------------|
| +     | +     | NA    | -      | -      | 1                      | 10                | 4                   |
| -     | -     | -     | NA     | NA     | 1                      | 1                 | 6                   |
| -     | +     | -     | +      | NA     | 0                      | 10                | 0                   |
| -     | +     | NA    | -      | -      | 1                      | 10                | 4                   |

137 *NA: not available.*

138 *Analysis methods*

139 Primary analysis

140 The primary endpoint is viral clearance in respiratory samples at day 3. The primary analysis will be  
 141 based on the ITT population (i.e., all randomized participants). We will estimate the cumulative  
 142 probability of being in clearance in each randomization group by using the Kaplan-Meier estimator. We  
 143 will compare the cumulative probability of clearance at day 3 between the two groups by using a chi-  
 144 square test based on a  $\log(-\log(\cdot))$  transformation for the survival function.[Klein et al. Statist. Med.  
 145 2007; 26:4505-4519].

$$\chi^2 = \frac{\left\{ \log\left(-\log\left(\hat{S}_1(t)\right)\right) - \log\left(-\log\left(\hat{S}_0(t)\right)\right) \right\}^2}{\frac{\hat{\sigma}_1(t)^2}{\log\left(\hat{S}_1(t)\right)^2} + \frac{\hat{\sigma}_0(t)^2}{\log\left(\hat{S}_0(t)\right)^2}}$$

146 Under the null hypothesis of no difference in probability of being in clearance between the two groups,  
 147 the statistic of test is asymptotically  $\chi_1^2$ -distributed. We will provide the between-group difference in  
 148 probability of viral clearance at day 3 and the associated 95% confidence interval based on the cloglog  
 149 transformation of the survival function.

150 Secondary analyses

151 In secondary analyses,

- 152 1) We will compare the respiratory clearance probability functions from day 1 to 14 between the  
153 two groups by using a log-rank test.
- 154 2) We will calculate the area under each respiratory clearance-free probability curve which gives  
155 the mean time to viral clearance up to day 14. We will estimate the mean difference in time  
156 post-viral clearance between groups and the associated 95% confidence interval.
- 157 3) We will compare how the proportion of negative oropharyngeal sample results evolved over  
158 time between treatment groups by using random-intercepts logistic regression models for  
159 longitudinal binary outcome data.
- 160 4) We will repeat the primary analysis for fecal viral clearance at day 14.
- 161 5) We will repeat the secondary analyses 1)-3) above for fecal viral clearance.
- 162 6) We will repeat the primary and secondary analysis by considering the combined oropharyngeal  
163 and/or fecal sample results. If both types of samples are available on a given day, we will  
164 consider the result to be positive if at least one of the sample results is positive, and negative  
165 otherwise. If only one type of sample is available on a given day and it is positive (respectively  
166 negative), the result will be positive (negative) for that day.
- 167 7) We will compare the proportion of participants who progressed to severe COVID disease  
168 between groups.
- 169 8) We will compare the proportions of participants free of symptoms. We will include participants  
170 who reported symptoms on Day 1 and we will assess the time to symptom resolution (symptom  
171 no longer reported). We will analyze 8 symptom categories described in Table 3.
- 172 9) We will repeat the primary and secondary analyses for viral clearance in the mITT population.
- 173 10) We will repeat the primary and secondary analyses for viral clearance in the per protocol  
174 population.  
175

#### 176 Subgroup analyses

177 We pre-specified subgroup analyses of viral clearance and symptom resolution according to BMI (<25  
178 kg/m<sup>2</sup> vs. ≥25 kg/m<sup>2</sup>) and according to diabetes.

#### 179 Exploratory analyses

180 In exploratory analyses, we will repeat the primary and secondary analyses of viral clearance by  
181 calculating the time to viral clearance from the confirmatory PCR before randomization.

182 Moreover, in an analysis blinded to random allocation, we will analyze the trajectories of oropharyngeal  
183 and fecal sample results. In particular, we will identify participants with a negative test result followed  
184 by at least one positive test result (as defined by the DSL COVID-19 Assay); we will examine the Ct values  
185 of the positive test results following a negative test result. We will repeat the primary and secondary  
186 analyses by considering alternative thresholds to define a positive result, based on the blinded review of  
187 data.

188 We also will perform longitudinal analyses to assess the between-group difference in gene expression  
189 over time. For each participant and each sample, we will calculate the difference in expression (in terms  
190 of quantification cycle) between the target gene (SARS-CoV-2 specific nucleocapsid N1; panspecific CoV  
191 nucleocapsid N3; or SARS-CoV-2 spike) and a reference gene (RNase P):  $\Delta Cq = Cq(\text{target gene}) - Cq(\text{reference gene})$ . We will create spaghetti plots in each randomization group with lowess  
192 smoother curve superimposed. We will create heatmaps of  $\Delta Cq$  values scaled to the mean and standard  
193 deviation within each participant. We will use linear mixed models, including a term for the group, a  
194 term for time, and group x time interaction term and a subject-level random intercept, to compare the  
195 trajectories in normalized expression between groups over time.  
196



197 Data will include a number of non-detects, i.e. reactions lacking a Cq value. Missing Cq value can  
198 correspond to a true Cq value above the Cq threshold. Alternatively it can correspond to zero expression  
199 (no amplification above the Cq threshold). Or it can correspond to a failure to detect a true Cq value  
200 below the Cq threshold. We will account for non-detects by setting undetermined Cq values at 40. In  
201 sensitivity analyses, we will account for non-detects by using hot deck imputation.

202 We will also consider the following modified ITT analyses of viral clearance:

203 - for the analysis based on oropharyngeal samples, fecal samples, and both types, we will include  
204 participants who took at least one pill, have a positive test result at any time during the trial and have  
205 Day 3 sample results available for analysis.

206 - for the analysis based on fecal samples, we will include participants who took at least one pill, have a  
207 positive oropharyngeal test result and have Day 3 fecal sample results available for analysis.

#### 208 *Missing data*

209 For the longitudinal analyses, we will perform sensitivity analyses by imputing data according to  
210 sequential multiple imputation

#### 211 *Harms*

212 The number (and percentage) of patients experiencing each adverse event will be presented, both for  
213 the overall safety population and in each randomization group. We will not perform statistical testing.  
214 We will assess the clinical significance of the differences. Adverse events will include abdominal pain,  
215 congestion or runny nose, cough, diarrhea, dizziness, dyspnea, fatigue, fever or chills, headaches,  
216 hypoxia, loss of appetite, muscle or body aches, nausea, new loss of taste or smell, pruritus, shortness of  
217 breath/difficulty breathing, skin rash, sore throat, vomiting, and other.

#### 218 *Statistical software*

219 The analysis will be carried out by using SAS and R.

220

221

222 Table 3: Classification of symptoms into 8 categories

|                                                  |
|--------------------------------------------------|
| 1. Central nervous system                        |
| Dizziness<br>Fatigue<br>Headache                 |
| 2. Upper gastrointestinal                        |
| Appetite change<br>Nausea<br>Vomiting            |
| 3. Lower gastrointestinal                        |
| Abdominal pain<br>Diarrhea                       |
| 4. Ear, nose, throat                             |
| Sore throat<br>Congestion<br>Loss of taste/smell |
| 5. Respiratory/Pulmonary                         |
| Cough<br>Dyspnea/Shortness of breath<br>Hypoxia  |
| 6. Musculoskeletal                               |
| Muscle aches                                     |
| Dermatologic                                     |
| Rash<br>Pruritus                                 |
| 7. Systemic                                      |
| Fever/Chills                                     |
| 8. Other                                         |

223
