# Supplementary material for: Efficacy of Niclosamide vs Placebo in SARS-CoV-2 Respiratory Viral Clearance, Viral Shedding, and Duration of Symptoms Among Patients With Mild to Moderate COVID-19: A Phase 2 Randomized Clinical Trial
Source: PubMed Central journal article supplement (PMC8829666; doi:10.1001/jamanetworkopen.2021.44942), 2022-02-09
Supplement: jamanetwopen-e2144942-s003.pdf [file jamanetwopen-e2144942-s003.pdf]

## Data Sharing Statement

Cairns DM, Dulko D, Griffiths JK, et al. Efficacy of niclosamide vs placebo in SARS-CoV-2 respiratory viral clearance, viral shedding, and duration of symptoms among patients with mild to moderate COVID-19: a phase 2 randomized clinical trial. *JAMA Network Open*. 2022;5(1):e2144942. doi:10.1001/jamanetworkopen.2021.44942

### Data

**Data available:** Yes

**Data types:** Deidentified participant data

**How to access data:** [hselker@tuftsmedicalcenter.org](mailto:hselker@tuftsmedicalcenter.org)

**When available:** With publication

### Supporting Documents

**Document types:** Statistical/analytic code, Informed consent form

**How to access documents:** [hselker@tuftsmedicalcenter.org](mailto:hselker@tuftsmedicalcenter.org)

**When available:** With publication

### Additional Information

**Who can access the data:** Anyone requesting the data shall be provided access.

**Types of analyses:** Data can be provided for any purpose.

**Mechanisms of data availability:** The data will be made available upon request.
